# Supplementary material for: Antigenic evolution of human influenza H3N2 neuraminidase is constrained by charge balancing
Source: eLife journal article supplement (doi:10.7554/elife.72516), 2021-12-08
Supplement: supp [file elife-72516-supp-v1.zip]

Archive with 29 entries (29 files):
- elife_poa_e72516_Supplementary_file_1.xlsx
- elife_poa_e72516_Supplementary_file_2.tsv
- elife_poa_e72516_Figure_1_source_data_1.zip
- elife_poa_e72516_Figure_1_source_data_2.zip
- elife_poa_e72516_Figure_2_source_data_1.xlsx
- elife_poa_e72516_Figure_2_source_data_2.zip
- elife_poa_e72516_Figure_4_source_data_1.zip
- elife_poa_e72516_Figure_5_source_data_1.zip
- elife_poa_e72516_Figure_5_source_data_2.csv
- elife_poa_e72516_Transparent_Reporting_File.pdf
- elife_poa_e72516_Figure_1_figure_supplement_1.jpg
- elife_poa_e72516_Figure_1_figure_supplement_2.jpg
- elife_poa_e72516_Figure_1_figure_supplement_3.pdf
- elife_poa_e72516_Figure_2_figure_supplement_1.jpg
- elife_poa_e72516_Figure_3_figure_supplement_1.pdf
- elife_poa_e72516_Figure_3_figure_supplement_2.pdf
- elife_poa_e72516_Figure_3_figure_supplement_3.pdf
- elife_poa_e72516_Figure_3_figure_supplement_4.pdf
- elife_poa_e72516_Figure_3_figure_supplement_5.pdf
- elife_poa_e72516_Figure_4_figure_supplement_1.pdf
- elife_poa_e72516_Figure_4_figure_supplement_2.pdf
- elife_poa_e72516_Figure_4_figure_supplement_3.pdf
- elife_poa_e72516_Figure_4_figure_supplement_4.jpg
- elife_poa_e72516_Figure_5_figure_supplement_1.pdf
- elife_poa_e72516_Figure_5_figure_supplement_2.pdf
- elife_poa_e72516_Figure_5_figure_supplement_3.pdf
- elife_poa_e72516_Figure_5_figure_supplement_4.pdf
- elife_poa_e72516_Figure_5_figure_supplement_5.jpg
- elife_poa_e72516_Figure_5_figure_supplement_6.pdf
