# Supplementary material for: Antigenic evolution of human influenza H3N2 neuraminidase is constrained by charge balancing
Source: eLife journal article supplement (doi:10.7554/elife.72516), 2021-12-08
Supplement: supp [file elife-72516-supp-v1.zip › elife_poa_e72516_Figure_2_source_data_1.xlsx]

## Sheet: Sheet1
Genetic background	Variant	Fitness
HK68	NDEGEEL	-1.1754
HK68	KNEGKKL	-1.73792
HK68	KSRGEES	-1.31488
HK68	NNRSKTS	-1.39177
HK68	NNRNEKS	-1.1735
HK68	KDRGEDS	-0.837556
HK68	KSKNKDL	-1.61677
HK68	KDRSKKL	-1.34048
HK68	NDENKEL	-1.41172
HK68	NNEGKTS	-1.17744
HK68	KSEGKKS	-1.38166
HK68	KSESKDL	-1.20571
HK68	NSKSETL	-0.341763
HK68	KDESEES	-0.942115
HK68	KSRSETL	-1.48244
HK68	KDENKKL	-1.17562
HK68	NDRSEKS	-0.577427
HK68	KSESKEL	-1.71412
HK68	KDESETS	-0.715078
HK68	KDRGEDL	-1.19485
HK68	NNKGEKL	-1.72397
HK68	KSKSEDS	-0.678413
HK68	KDESEDS	-0.861555
HK68	KDKNEKL	-1.36877
HK68	NSESETS	-1.54023
HK68	KNKSEDS	-0.81002
HK68	NNENKKS	-1.60836
HK68	NNESKTS	-2.01576
HK68	NNRGKTS	-1.37218
HK68	KNESEKS	-0.82511
HK68	KDEGETL	-0.935125
HK68	NNKGKKS	-1.84748
HK68	KNRNKDS	-1.41175
HK68	KDESKES	-0.509858
HK68	NSRGEKS	-1.21383
HK68	NSKGEEL	-0.991102
HK68	KDKSKKS	-1.38922
HK68	KSKNETL	-1.29857
HK68	NNENKES	-1.54196
HK68	NDEGKKL	-1.64873
HK68	KNKSEKS	-2.20995
HK68	KNKNEDS	-1.01253
HK68	NSRNKTL	-1.7174
HK68	KSRNKTS	-2.17721
HK68	KDKNEEL	-0.959673
HK68	NNRGEDL	-1.27914
HK68	NNEGKKS	-1.06483
HK68	KDRGKEL	-1.38726
HK68	NSEGETS	-1.51964
HK68	KSKSKKL	-1.50433
HK68	NNRNETL	-0.525489
HK68	KSKNKKS	-1.55589
HK68	KSKNKTL	-2.0466
HK68	KDEGKKS	-1.34386
HK68	NSENKDL	-0.782801
HK68	KDESKTL	-1.26592
HK68	NNRNETS	-0.275769
HK68	NSKGEDL	-1.1406
HK68	NSESEKS	-0.706941
HK68	NSKNKEL	-0.0272051
HK68	KDKGEES	-1.24989
HK68	KSKSETS	-1.79083
HK68	NDKNKDL	-0.689484
HK68	NNENKEL	-1.61466
HK68	NSENEKL	-1.21084
HK68	KSENEDS	-1.90193
HK68	NDRGETL	-0.931961
HK68	NNKNKDL	-1.03141
HK68	KNENEES	-1.38546
HK68	KDKGKES	-1.37165
HK68	NNKNKTL	-1.37795
HK68	NDEGEKL	-1.02082
HK68	NNEGEKL	-1.17499
HK68	NNRGKEL	-1.39421
HK68	KSEGKES	-1.32141
HK68	NSKSKES	-1.52515
HK68	KNRSEES	-1.04767
HK68	NSRGEDS	-0.988648
HK68	NDESKKS	-0.927001
HK68	NDENETS	-0.638731
HK68	KNRGKDL	-1.73657
HK68	NSEGEKL	-1.07382
HK68	NNRSEKS	-1.13284
HK68	NDKSEES	-0.583606
HK68	KNKSEKL	-1.80406
HK68	NDRNEES	-0.565903
HK68	KSRGKTS	-1.24305
HK68	NNKNKEL	-1.2522
HK68	NSENETS	-0.992835
HK68	NDKGKTL	-0.901699
HK68	NNESKDS	-1.04176
HK68	KDKGKDL	-2.20057
HK68	NDRGEKL	-0.636278
HK68	NSRGKTS	-1.2022
HK68	KNKSEDL	-0.344156
HK68	NDKNEDL	-0.382553
HK68	NSRSEDS	0.00531758
HK68	KNENEKS	-1.41079
HK68	NSEGKDL	-1.54656
HK68	KNRNETL	-1.44669
HK68	KNRGETL	-1.48457
HK68	KSESKTS	-1.44902
HK68	KDRGKDS	-1.5337
HK68	NSKSEES	0.152794
HK68	KNENEDS	-1.37868
HK68	NDESEDL	-1.88557
HK68	KSEGETL	-1.4325
HK68	NNEGEDS	-1.78598
HK68	NSENKES	-2.59357
HK68	KNKGEKS	-2.14752
HK68	NNKNKKS	-1.49389
HK68	NSKGKTL	-1.3341
HK68	NSKGEKS	-1.02001
HK68	KNRNKKS	-1.36196
HK68	KSENETS	-0.474408
HK68	NDKGEES	-0.832549
HK68	KDEGKTL	-1.70852
HK68	NNKGEES	-0.74957
HK68	KSEGKKL	-1.18621
HK68	NDRSETS	-0.137593
HK68	NDESEEL	-1.52423
HK68	NSKNKDS	-0.34876
HK68	KNRNKTL	-1.22687
HK68	KSKSKTS	-1.67616
HK68	NDRSKDS	0.693929
HK68	NSKNETS	-0.503527
HK68	NNEGEDL	-0.893364
HK68	NNKNEDL	0.0483013
HK68	KNRGKTS	-2.17013
HK68	NNRNEEL	-0.960164
HK68	NSESEDS	-1.24962
HK68	NDRSETL	-0.235449
HK68	NNRSKDS	-1.06485
HK68	KSKGKDS	-1.35242
HK68	NNENKDL	-1.32461
HK68	KNKGETL	-1.33706
HK68	NNKNKKL	-1.17878
HK68	KDRGEEL	-1.4804
HK68	KSENKDL	-1.26321
HK68	KSRSEDL	-0.909452
HK68	NDRSKES	-0.462532
HK68	KDENETL	-0.72777
HK68	KNEGEEL	-2.0204
HK68	KDKGKTS	-1.51118
HK68	NSRSETS	-0.40527
HK68	KSRNETS	-0.84679
HK68	KNESEDS	-1.09101
HK68	NSEGKDS	-1.36275
HK68	KSEGKTS	-1.08761
HK68	KNEGKEL	-0.9902
HK68	KDRSKTS	-1.60442
HK68	KNRGEDS	-1.1219
HK68	NSKSETS	-0.197007
HK68	NSKSKKL	-1.83414
HK68	KDENEES	-1.03117
HK68	KNESKKL	-1.7454
HK68	NNKSKKS	-1.4461
HK68	KDKNKKL	-2.47705
HK68	KSKGKKL	-2.13724
HK68	KDRNKES	-1.38019
HK68	NNRSKTL	-1.2405
HK68	NDRSEDS	-0.125999
HK68	NDRGKKS	-1.48992
HK68	KSRGEDS	-0.766942
HK68	KNEGEKS	-0.695278
HK68	KSESEDL	-1.62179
HK68	NDRNKKS	-1.7674
HK68	NNENEEL	-1.41956
HK68	KDESKDL	-0.648809
HK68	NSENKEL	-1.95927
HK68	KSRNEDL	-1.63081
HK68	KSEGKDS	-1.54568
HK68	KNRGKKL	-2.08442
HK68	KNESKKS	-1.466
HK68	KSENEES	-0.827498
HK68	KNKSEEL	-1.06877
HK68	KNKGKDL	-1.638
HK68	NSRGEEL	-1.31576
HK68	KNKNKDL	-1.3066
HK68	KNKNKES	-1.32302
HK68	KDEGEDS	-1.09154
HK68	KNRGKKS	-1.68016
HK68	NDKNETS	0.168535
HK68	NNKGKEL	-1.43665
HK68	NSESEKL	-0.90274
HK68	KDKGKKL	-1.63974
HK68	KSRNEKL	-1.0354
HK68	NSESKKS	-1.36133
HK68	NDRGKTS	-1.40942
HK68	NNRSETL	-1.24071
HK68	NNENETS	-0.806777
HK68	KNRNKTS	-1.62678
HK68	KDRGEKS	-1.33473
HK68	NSKNKES	-1.75972
HK68	KSRSKDS	-1.15863
HK68	KNRGEES	-1.22477
HK68	NSENKTS	-1.74293
HK68	NSESKTS	-1.22759
HK68	NSRSKKS	-1.47348
HK68	NDRNETL	0.106225
HK68	NNESKKL	-1.49376
HK68	NNENEDS	-1.90592
HK68	NNRSEKL	-1.04568
HK68	KDEGEEL	-1.12606
HK68	KDESETL	-1.32605
HK68	KNESKES	-0.929933
HK68	NDKSEEL	-0.778379
HK68	NSKNEKS	-1.3874
HK68	KSENKEL	-1.40624
HK68	NDRGEES	-1.07956
HK68	KNESKTL	-2.00616
HK68	NSENEEL	-2.00479
HK68	KDRSKKS	-1.59445
HK68	KSEGKDL	-1.17329
HK68	KSRNEEL	-1.04095
HK68	KNKSKKS	-1.32144
HK68	NSEGKEL	-1.90892
HK68	NSEGKTS	-1.96484
HK68	NDEGKKS	-1.31922
HK68	NSRGEKL	-2.27843
HK68	KDKNKES	-1.13885
HK68	KSESKTL	-1.9967
HK68	NNKGEEL	-0.920734
HK68	NSRSKDL	-0.939637
HK68	KSKSKDL	-1.81236
HK68	NSRSETL	-0.403418
HK68	KDRSETL	-0.642863
HK68	KDRSEDS	0.73982
HK68	KNKGKDS	-1.74145
HK68	NSKNKKS	-1.26927
HK68	KDENKTS	-0.828165
HK68	KSESETL	-1.85925
HK68	KSKGEKS	-0.898781
HK68	KNRGEDL	-1.31107
HK68	NSEGEDL	-1.46814
HK68	NNEGKDL	-1.20209
HK68	KNEGKES	-1.61945
HK68	NDESKDL	-0.767706
HK68	NSRNKKL	-1.6321
HK68	NSRNEKL	-1.51466
HK68	KDRNEES	-0.531795
HK68	NDKNKKS	-1.58651
HK68	NNKSKTS	-1.39628
HK68	NDRNKTS	-0.763429
HK68	NDRNEEL	-0.636621
HK68	NDRSEDL	-0.6632
HK68	NNENEES	-0.863262
HK68	KNKSEES	-0.656588
HK68	NNENKDS	-1.25874
HK68	NDRSKTS	-1.08944
HK68	KDKSKTL	-1.32755
HK68	KDEGEKL	-1.71028
HK68	NNKSKEL	-1.17541
HK68	KSRGETS	-1.37698
HK68	KSKSEES	-1.04085
HK68	KDRGKTL	-1.57817
HK68	KDESEEL	-1.61176
HK68	KSESEKS	-0.806605
HK68	KNRNKES	-2.34088
HK68	NDRNEDS	-0.450755
HK68	KSKSKTL	-1.40416
HK68	KSESKDS	-0.806187
HK68	KDRGEKL	-1.18514
HK68	KDRSEES	-0.690609
HK68	KDRSETS	-0.2053
HK68	KSRGKEL	-1.54327
HK68	NDENEKS	0.0470813
HK68	NNRGEEL	-1.01016
HK68	KDRNKKS	-1.37576
HK68	NDKNEEL	-0.438755
HK68	KDRSKEL	-1.2538
HK68	KDRSKDL	-0.75332
HK68	KSENKDS	-1.3789
HK68	NDENKTL	-1.54025
HK68	NSKSEDS	-0.148413
HK68	KNRSKES	-2.21891
HK68	NNRSEES	-0.508102
HK68	NSRSEDL	-1.15258
HK68	NDKNETL	-0.722403
HK68	KSEGKEL	-1.8904
HK68	KNKNEES	-1.2308
HK68	NNRSKES	-2.55918
HK68	NNKSEES	-0.550491
HK68	NSRSKTL	-1.1791
HK68	KSEGEEL	-1.19746
HK68	KDRGKES	-2.33668
HK68	NSENKKS	-1.02391
HK68	KSKSEDL	-0.821862
HK68	NNENEKS	-0.595046
HK68	NSKSKTL	-1.88663
HK68	NDENEEL	-1.61933
HK68	KNRGETS	-0.975677
HK68	NNESEDL	-1.40123
HK68	NDRGEEL	-0.360224
HK68	NDESEKL	-1.02377
HK68	NNKGEDL	-1.02634
HK68	NNKNKDS	-1.46489
HK68	KNKSKDS	-1.55135
HK68	NDKNKEL	-0.9968
HK68	NNKGKKL	-1.70418
HK68	KSRSKES	-1.82888
HK68	NNKSEKL	-1.12512
HK68	KNKGKKL	-3.40177
HK68	KNEGKKS	-1.50314
HK68	KSRNKKS	-1.97703
HK68	KDESKEL	-1.81263
HK68	KDKSETL	-0.638714
HK68	NDKGEKL	-1.14808
HK68	NNRGEKL	-1.31631
HK68	KSKSEKL	-1.78199
HK68	KNENKDL	-1.53591
HK68	NSRSKTS	-1.11432
HK68	NSKNEES	-0.934957
HK68	KSENEKS	-0.810921
HK68	KSKNEDL	-1.2653
HK68	KNRNKDL	-1.90674
HK68	KNESETL	-1.18607
HK68	KDRSKES	-1.53455
HK68	NSRGKDS	-0.961935
HK68	KNRSKTS	-3.04061
HK68	NDESKES	-1.46981
HK68	KSRSEES	-1.00004
HK68	KDESEKL	-1.10585
HK68	NDKSETS	0.00937896
HK68	KDRGKKS	-1.31677
HK68	KDKNKTS	-1.33107
HK68	NDRSKKS	-1.28782
HK68	NDRGEKS	-0.763132
HK68	NNKSKTL	-1.59601
HK68	NNEGEKS	-0.878029
HK68	NDRNKKL	-1.22215
HK68	NDEGEES	-1.02742
HK68	KSRNKTL	-1.63994
HK68	KDEGKKL	-0.998614
HK68	NDKNEDS	-0.35525
HK68	NDENETL	-1.08904
HK68	KSRNEES	-1.1426
HK68	KNRGEEL	-0.744675
HK68	KNEGEES	-1.30841
HK68	KSKNEKL	-1.3951
HK68	NNENETL	-1.30131
HK68	NDRNETS	-0.33849
HK68	NNRGETL	-1.10258
HK68	KNKNKKS	-1.53976
HK68	NSESKDS	-0.948753
HK68	NSRGKES	-1.60177
HK68	NNENKTL	-1.52643
HK68	NNRGKTL	-1.24112
HK68	NSEGKTL	-1.66814
HK68	NDKGKDL	-1.52821
HK68	KSRSKDL	-1.45997
HK68	NDRNKEL	-1.38505
HK68	KNRSETL	-0.948409
HK68	NDRGKEL	-0.524197
HK68	NNRNKEL	-1.51191
HK68	KSKGEKL	-3.0681
HK68	NNEGKTL	-1.41394
HK68	NDRNKTL	-1.79755
HK68	KNKNEEL	-1.6715
HK68	NSRSKKL	-1.68688
HK68	NDKGKKS	-1.64272
HK68	KNRNEDL	-1.5375
HK68	NDKSKTS	-1.00869
HK68	NDKSETL	-0.560781
HK68	NSRGKKL	-1.1916
HK68	KSENKKL	-1.60227
HK68	KNRSKKS	-1.16753
HK68	NNRGEES	-0.513096
HK68	NDENEDS	-1.75918
HK68	NNRNEES	-0.423705
HK68	NSENKDS	-1.29208
HK68	NSKSEDL	-0.352883
HK68	NDESKKL	-1.11391
HK68	KSRNKES	-1.32733
HK68	NDRSEKL	-0.881505
HK68	NSRGETL	-0.991351
HK68	NSENEES	-1.91237
HK68	KDRSKTL	-1.62808
HK68	KSENETL	-1.1105
HK68	NSRSKEL	-1.60772
HK68	NNKGKES	-1.79539
HK68	NNKNKTS	-1.61284
HK68	NDKGEEL	-1.02247
HK68	KDRNKEL	-1.3817
HK68	KDKSKTS	-1.32584
HK68	NNKSKES	-1.18482
HK68	NSRNKEL	-1.09997
HK68	KNENEDL	-1.69345
HK68	KNKGEDL	-0.984577
HK68	KNRSKDL	-1.39823
HK68	KSRSEKL	-1.25677
HK68	KNEGKDS	-2.99401
HK68	KSESKKL	-1.46455
HK68	KSRSKKL	-1.86501
HK68	KNKNKEL	-1.55232
HK68	KDEGEDL	-1.64748
HK68	NSRSEKL	-1.06857
HK68	KDENKDS	-1.01515
HK68	NSRSKES	-1.49518
HK68	NDRSKEL	-1.48551
HK68	KSEGETS	-1.23479
HK68	KSEGEES	-1.53335
HK68	KDKGETL	-1.46272
HK68	KDRNEDL	-1.36356
HK68	KDKSKDS	-1.2175
HK68	KSRGEEL	-1.25993
HK68	KSKGETL	-0.898966
HK68	NSESKDL	-1.11724
HK68	NSRSKDS	-1.04812
HK68	KSKSETL	-1.39034
HK68	NDENKDS	-0.80726
HK68	NNRGEDS	-1.16425
HK68	NNRSKKL	-1.88878
HK68	NSKSEKL	-0.954429
HK68	NDRGEDS	-0.646099
HK68	KNESEES	-1.0547
HK68	NNRGKES	-1.33459
HK68	KDRSKDS	-0.907297
HK68	NDKGEDS	-0.599781
HK68	NNRNKDS	-1.11371
HK68	KSEGEKS	-1.40329
HK68	NSRSEEL	-0.718006
HK68	NDKSEDL	-0.806118
HK68	NSEGEKS	-1.16955
HK68	KDRGKKL	-1.50149
HK68	KDRSEDL	-0.761477
HK68	KDKNETS	-0.726881
HK68	KSESETS	-0.763759
HK68	NSKGKKS	-1.66574
HK68	KSRGKDL	-1.02769
HK68	NDKNKES	-0.877078
HK68	NNKGKTS	-1.1787
HK68	KDENEKL	-0.549898
HK68	NDEGKDL	-1.48428
HK68	NNRNKDL	-1.79836
HK68	KNRSEKS	-2.62362
HK68	NDENKKL	-1.23229
HK68	KNEGETL	-1.07442
HK68	NNENEKL	-0.786534
HK68	KSKGEES	-1.17743
HK68	KDKGKTL	-1.43631
HK68	KDRGETL	-1.41
HK68	NSEGKKS	-1.37287
HK68	NNRNKES	-1.25779
HK68	NDEGKES	-2.15849
HK68	NDKGEDL	-0.635782
HK68	NDKNEKL	-0.914981
HK68	NDEGKTS	-1.07009
HK68	KSRGKDS	-1.47202
HK68	KNKSETS	-1.79898
HK68	NSENEDL	-1.4769
HK68	KSKNEKS	-1.34464
HK68	KNENEKL	-1.32056
HK68	KNEGEDS	-1.17722
HK68	KDKNEKS	-1.65531
HK68	KNRGKTL	-1.63747
HK68	NSRNKES	-1.43851
HK68	NSKSKTS	-1.13392
HK68	NNESEDS	-1.38833
HK68	NSKGKDL	-1.54733
HK68	KNRNEEL	-0.980465
HK68	NSKGEDS	-0.793886
HK68	KNRNEKL	-1.47686
HK68	NNESKEL	-2.00695
HK68	KDRNKTS	-1.70785
HK68	KDKSEKL	-1.446
HK68	KDRGEES	-1.11805
HK68	NDKNKDS	0.0670004
HK68	KNKSKTS	-1.40345
HK68	NNESETS	-1.16033
HK68	NDRSKTL	-1.49582
HK68	NSESKKL	-1.65393
HK68	NSKNEDL	-0.571476
HK68	NSRGETS	-0.206204
HK68	KSKNKDS	-2.12978
HK68	KNKNETS	-0.749554
HK68	KSKNKTS	-2.02185
HK68	KNRGEKL	-1.33277
HK68	NSRNETS	-0.1743
HK68	NNESEKL	-1.24304
HK68	NSESEDL	-1.13479
HK68	KNENKKS	-0.625201
HK68	NDKGKEL	-0.919927
HK68	NSKGKKL	-1.5486
HK68	KSENKKS	-1.91817
HK68	KNEGKDL	-1.5021
HK68	KSESKES	-1.47089
HK68	KNKSKES	-1.11577
HK68	NDENKTS	-1.16271
HK68	NDKSKES	-0.554799
HK68	KDKSEDS	-0.0123708
HK68	KDRNEKL	-1.74464
HK68	NSKGEKL	-1.13931
HK68	KSRGEKL	-1.54767
HK68	KSRNEDS	-0.727835
HK68	KSRNKDS	-1.06276
HK68	NSKNKTS	-1.17036
HK68	KDRNETL	-0.63698
HK68	NNKGKDL	-1.21207
HK68	KNRNEES	-1.16581
HK68	KNESEEL	-1.43046
HK68	KSKSKEL	-1.50123
HK68	NDKSKEL	-0.659723
HK68	NSESEES	-1.34973
HK68	KSKSKDS	-1.97287
HK68	NSESKTL	-1.58241
HK68	NDRSEES	0.222
HK68	NNENEDL	-1.79767
HK68	KDENEKS	-0.508532
HK68	KSEGEDL	-1.0269
HK68	KNKGEEL	-1.63512
HK68	KSENKTL	-2.02816
HK68	KNEGKTL	-1.42682
HK68	NDKGKKL	-1.55185
HK68	NNRNEDL	-1.38465
HK68	KNENETL	-1.0733
HK68	KNRGKEL	-1.28784
HK68	KDKGEKS	-1.57899
HK68	KNKGKEL	-1.38425
HK68	KSKSEEL	-0.953146
HK68	NDESETS	-0.20356
HK68	KNRNEKS	-0.977543
HK68	NNRNEDS	-0.723329
HK68	KSESKKS	-1.44565
HK68	KSKNETS	-1.33365
HK68	KSESEKL	-0.645756
HK68	KDKGETS	-1.24589
HK68	KDKSKEL	-1.07408
HK68	NSEGEES	-1.10509
HK68	NNRSETS	-0.866499
HK68	KSKNEEL	0.215202
HK68	NNESEKS	-0.805913
HK68	KDENEDL	-1.47924
HK68	NSKNKTL	-1.77475
HK68	KDESEDL	-1.10711
HK68	KDEGKES	-1.41265
HK68	NNRSKDL	-1.1112
HK68	KSKNKEL	-1.47153
HK68	KNEGKTS	-1.23043
HK68	NNESEEL	-1.40152
HK68	KNKNKTS	-1.56516
HK68	NSKGETL	-1.36809
HK68	NDENKKS	-1.12669
HK68	NSKNEEL	-1.35512
HK68	NNRGKDL	-1.86577
HK68	KNRGKES	-1.56576
HK68	NDEGEKS	-1.29682
HK68	KNRNKEL	-1.38217
HK68	NSRNKKS	-2.26304
HK68	NNEGEES	-1.64825
HK68	NDRGKTL	-1.7757
HK68	NNKSKDS	-1.16981
HK68	KNKSKEL	-1.48463
HK68	NNESEES	-1.13687
HK68	KDEGEES	-1.54128
HK68	NDESKDS	-0.453605
HK68	KDKNKDS	-0.87393
HK68	NNESETL	-1.09882
HK68	NNRGKKS	-1.72077
HK68	KDEGKDL	-1.56452
HK68	NDKGKDS	-0.791949
HK68	NDKSEKL	-0.561727
HK68	NDESKEL	-1.39126
HK68	NNEGKEL	-1.9129
HK68	NSESETL	-1.79203
HK68	KDKGEDS	-1.31742
HK68	KNRNEDS	-1.37663
HK68	NNKNEEL	-0.426547
HK68	KSKNEDS	-0.630808
HK68	NSKSKDS	-1.12147
HK68	NDKSKDS	-0.676409
HK68	NDKNKTL	-1.06039
HK68	KDKSEKS	-0.982827
HK68	KSKGEDL	-1.3417
HK68	KNENKTS	-2.15429
HK68	NNEGKDS	-1.17409
HK68	NDRGETS	-0.643515
HK68	NDKNKTS	-0.976915
HK68	KNRNKKL	-1.26072
HK68	KDESEKS	-0.355338
HK68	NSKNEDS	-0.560482
HK68	KDRGKTS	-1.6005
HK68	KDKSEEL	-0.802136
HK68	NNKGETS	-0.851919
HK68	KDRGETS	-0.904727
HK68	KSKGKES	-1.70465
HK68	NNKNEKL	-1.25296
HK68	KDENKDL	-1.00287
HK68	NSRNKDS	-1.25101
HK68	NNRGKKL	-1.36651
HK68	KNENKKL	-1.82279
HK68	NNEGETL	-1.26737
HK68	KSENEDL	-1.77311
HK68	KNESKEL	-1.63803
HK68	KDENEDS	-1.66979
HK68	KSKGETS	-1.23919
HK68	NSRNEES	-0.0382345
HK68	KSKGKTL	-1.57086
HK68	KDRNEDS	0.0124232
HK68	NSRSEKS	-0.923413
HK68	NDRGKES	-0.653351
HK68	NNEGKKL	-1.64815
HK68	NSKSEEL	-0.939797
HK68	KDRNKDL	-1.12519
HK68	KDKSKDL	-1.11861
HK68	KSENEKL	-1.20836
HK68	NSRGEES	-1.08873
HK68	NDENKES	-1.57119
HK68	KSKSKKS	-1.35583
HK68	KDKNKKS	-1.38515
HK68	NNRSEDL	-1.14644
HK68	KNESEDL	-1.007
HK68	KNKGEDS	-1.26628
HK68	NSESKES	-1.69909
HK68	KDRNKDS	-0.921786
HK68	NDEGKTL	-1.34157
HK68	KDESKKL	-1.56097
HK68	NDKSKKS	-1.40178
HK68	KNENKEL	-1.20655
HK68	KDEGKTS	-1.17149
HK68	KDKNEDS	-0.145538
HK68	NNKNEDS	-0.296571
HK68	NNKNEES	-1.14425
HK68	KSEGKTL	-1.55024
HK68	NDESKTL	-2.08047
HK68	NNRNEKL	-0.75041
HK68	NNRGETS	-0.79031
HK68	KNKSKKL	-1.54611
HK68	KSRGKTL	-1.23362
HK68	KNKGKKS	-1.72835
HK68	KNKSETL	-0.924334
HK68	KNEGEKL	-1.55116
HK68	KDKSKES	-1.52676
HK68	KNENKDS	-1.41577
HK68	NDEGKDS	-1.03458
HK68	NNKSKDL	-1.01805
HK68	NDRGKDL	-1.37133
HK68	NSESEEL	-2.53588
HK68	KSRSEKS	-1.42624
HK68	NSKGKEL	-1.21819
HK68	NDESEDS	-1.32837
HK68	KDEGEKS	-0.841776
HK68	NSEGEEL	-1.91101
HK68	NDKNKKL	-1.53911
HK68	KSRNEKS	-1.71782
HK68	KNRGKDS	-1.47716
HK68	NDKSEKS	-0.715696
HK68	NNEGETS	-1.17803
HK68	NDRNKDS	0.17756
HK68	KNESETS	-0.89718
HK68	KNKSKDL	-1.28128
HK68	KNKNEKS	-1.57861
HK68	NNKGKTL	-1.46551
HK68	NSRSEES	-0.0296069
HK68	NNESKTL	-2.04641
HK68	KNRSEDS	-0.450714
HK68	NSRGEDL	-1.30822
HK68	KNRNETS	-1.11337
HK68	KNEGEDL	-1.29562
HK68	NSENKTL	-1.39887
HK68	KSENKTS	-1.20903
HK68	KNKGKES	-1.73808
HK68	KSKGEEL	-1.19084
HK68	NSRNEEL	-1.09283
HK68	NSKNKKL	-1.7542
HK68	NSRNETL	-0.385948
HK68	KDRNEKS	-1.52737
HK68	NSRNEKS	-1.8236
HK68	KSESEES	-0.996174
HK68	NDKGETS	-0.875029
HK68	KNKGETS	-1.42702
HK68	KNRSKEL	-2.48989
HK68	KDENKES	-1.30202
HK68	NNKNETS	-0.389432
HK68	NNKSEDS	0.321195
HK68	KDEGETS	-0.856644
HK68	KSKGKTS	-1.51502
HK68	KSRNKDL	-1.25257
HK68	KNENKTL	-1.73964
HK68	KDEGKDS	-0.967452
HK68	NSENETL	-1.03362
HK68	KDKGKDS	-1.1922
HK68	KDENETS	-0.549655
HK68	NNRSKEL	-1.48988
HK68	KSRGKKL	-1.38628
HK68	KDRNEEL	-1.16532
HK68	NSRNEDS	-0.862157
HK68	NSKGEES	-1.1248
HK68	KSKSKES	-1.23069
HK68	KDENKEL	-1.27309
HK68	NNRSEEL	-0.303416
HK68	KSRSKTL	-1.13776
HK68	NSKGETS	-1.14598
HK68	NDKNEKS	-0.699996
HK68	NDRSEEL	-0.394648
HK68	NDENEES	-1.45461
HK68	KDESKKS	-0.84521
HK68	NNRSEDS	-0.424553
HK68	NNKGEDS	-0.0786083
HK68	KNRSEKL	-1.55105
HK68	KSRNKEL	-1.85678
HK68	NNEGKES	-1.4827
HK68	KSEGEDS	-1.67164
HK68	NSKNEKL	-0.99706
HK68	NNKGETL	-1.73462
HK68	KSRSEEL	-1.24476
HK68	NNKGKDS	-1.83293
HK68	NNESKKS	-1.19453
HK68	KNEGETS	-0.990559
HK68	NDKSKKL	-1.28916
HK68	KSRNKKL	-1.19544
HK68	KDKGEEL	-1.24152
HK68	NNKSKKL	-1.33418
HK68	NSKGKDS	-1.44975
HK68	NNRNKTS	-1.62595
HK68	NDKGETL	-0.00527414
HK68	NDKSEDS	0.488348
HK68	NDRNEDL	-0.894055
HK68	KDKGKKS	-1.96779
HK68	KSRSEDS	-0.538655
HK68	KNRSKKL	-1.92803
HK68	KDKNKEL	-1.00552
HK68	NSEGKES	-1.55977
HK68	NDEGETL	-1.78375
HK68	KNRSKDS	-1.80647
HK68	KSRGEDL	-1.72187
HK68	KNRSEDL	-0.938465
HK68	KDKSEDL	-0.402562
HK68	NDRNEKS	-1.10613
HK68	KDENEEL	-0.893264
HK68	KNENETS	-0.72321
HK68	NNKNKES	-1.55388
HK68	NNKSEDL	-0.739021
HK68	NNRGKDS	-1.38678
HK68	KDKGEKL	-2.19933
HK68	NSKSEKS	-0.95002
HK68	KSRGKES	-1.70005
HK68	KDRNKKL	-1.84692
HK68	NDEGEDL	-2.24069
HK68	NDEGEDS	-1.41547
HK68	KNRGEKS	-1.11243
HK68	KSKNEES	-0.878445
HK68	NNESKES	-1.28928
HK68	NSRGKDL	-1.29293
HK68	NDEGKEL	-2.28437
HK68	KSRSKTS	-1.54654
HK68	KNESEKL	-1.13126
HK68	KDKSETS	-0.257053
HK68	KNRSEEL	-1.14931
HK68	NDENEDL	-1.53289
HK68	NNKSETL	-0.498151
HK68	KNKSKTL	-2.86849
HK68	KDKNETL	-0.977147
HK68	KDKSKKL	-2.2452
HK68	KDESKDS	-0.415963
HK68	KNKNKDS	-1.52278
HK68	NDRGKDS	-0.874059
HK68	KSRGKKS	-1.72034
HK68	NSKSKDL	-1.63082
HK68	KDRSEEL	-0.766716
HK68	NSKSKKS	-1.49776
HK68	KDRNKTL	-1.24482
HK68	NNKGEKS	-1.11779
HK68	KNKNETL	-1.15713
HK68	KSRSKKS	-2.93619
HK68	KSKSEKS	-1.55245
HK68	NNRNKKS	-1.28161
HK68	NDRNEKL	-0.820679
HK68	NSKGKES	-1.32069
HK68	NNRNKTL	-1.23702
HK68	KDKNEDL	-0.431219
HK68	NSRNKDL	-1.41229
HK68	KNKGKTL	-1.77503
HK68	KSRGEKS	-1.06616
HK68	KNRSETS	-1.91012
HK68	NSKNETL	-0.311618
HK68	NDRGEDL	-1.19502
HK68	NSRGKTL	-1.38754
HK68	NDESEKS	-0.274259
HK68	KSEGEKL	-1.17691
HK68	NNKNETL	-0.526611
HK68	NSRGKEL	-2.60944
HK68	KDRGKDL	-1.60607
HK68	KSESEDS	-0.683747
HK68	KDKNEES	-0.498014
HK68	NNESKDL	-1.7883
HK68	KDKGKEL	-1.13045
HK68	NSRGKKS	-1.47868
HK68	KDKNKTL	-1.57393
HK68	KNESKDS	-1.25264
HK68	NSKGKTS	-1.4578
HK68	KSENEEL	-1.55616
HK68	NDRNKES	-0.725152
HK68	NSENKKL	-1.32174
HK68	NDESETL	-0.992771
HK68	NNKNEKS	-0.87551
HK68	NDESKTS	-0.539062
HK68	KSRNETL	-1.11464
HK68	NNKSEEL	-0.583448
HK68	KNESKDL	-1.41076
HK68	KSKGKDL	-1.27652
HK68	KDKSEES	-0.785097
HK68	NNENKTS	-1.4478
HK68	NDKGKES	-1.24121
HK68	NDENEKL	-0.533456
HK68	KSRSKEL	-1.61132
HK68	KNKNEDL	-1.0093
HK68	NDKGEKS	-1.54362
HK68	NDKSKTL	-0.442404
HK68	NDKGKTS	-1.07711
HK68	NSKNKDL	-1.23699
HK68	NDESEES	-1.52609
HK68	KNESKTS	-1.03278
HK68	KNENEEL	-1.42634
HK68	KSKNKKL	-1.41006
HK68	NSRNKTS	-2.23654
HK68	NSESKEL	-1.65516
HK68	KSKGKKS	-1.53038
HK68	NNRGEKS	-0.881402
HK68	NDRSKKL	-0.74023
HK68	NDKNEES	-0.360056
HK68	KSKGKEL	-1.60498
HK68	NDRGKKL	-1.45866
HK68	NNKSEKS	-1.37235
HK68	NSENEDS	-1.42641
HK68	NDRSKDL	0
HK68	KNRSKTL	-1.4247
HK68	KNKNEKL	-1.21925
HK68	KNKGEES	-1.12825
HK68	NNEGEEL	-1.60088
HK68	KNKNKKL	-1.49343
HK68	NSEGKKL	-1.42064
HK68	KDKNKDL	-1.03181
HK68	NSEGEDS	-1.58003
HK68	KSESEEL	-0.307975
HK68	KNKNKTL	-1.68107
HK68	NNENKKL	-2.17612
HK68	KDRNETS	-0.139547
HK68	KSKGEDS	-0.650431
HK68	KSENKES	-2.01137
HK68	NNRNKKL	-1.44512
HK68	KNKGEKL	-2.21915
HK68	NDKSKDL	-0.23799
HK68	KNENKES	-1.65046
HK68	KDESKTS	-0.91015
HK68	KNKGKTS	-1.56683
HK68	NSEGETL	-1.2972
HK68	NDENKDL	-1.77971
HK68	NSENEKS	-0.951931
HK68	KDENKTL	-1.41802
HK68	KDRSEKS	-1.06247
HK68	NSRNEDL	-1.83597
HK68	NDEGETS	-1.76147
HK68	NNKSETS	-0.546836
HK68	KDEGKEL	-1.3971
HK68	KSKNKES	-1.50837
HK68	NSKSKEL	-2.58613
HK68	KSRGETL	-1.45407
HK68	KDRSEKL	-1.40766
HK68	KDENKKS	-0.569886
HK68	KDKGEDL	-0.858095
HK68	NDRNKDL	-0.306648
HK68	KSRSETS	-0.89354
HK68	NNRSKKS	-1.17951
Bk79	NDEGEEL	-0.880095
Bk79	KNEGKKL	-0.863447
Bk79	KSRGEES	-0.150584
Bk79	NNRSKTS	-1.05642
Bk79	NNRNEKS	0.288351
Bk79	KDRGEDS	0.610318
Bk79	KSKNKDL	-0.428923
Bk79	KDRSKKL	-0.677436
Bk79	NDENKEL	-0.808688
Bk79	NNEGKTS	-1.0425
Bk79	KSEGKKS	-1.00092
Bk79	KSESKDL	-0.801253
Bk79	NSKSETL	-0.507693
Bk79	KDESEES	0.120593
Bk79	KSRSETL	-0.972335
Bk79	KDENKKL	-0.00885777
Bk79	NDRSEKS	0.0662345
Bk79	KSESKEL	-0.625204
Bk79	KDESETS	-0.209693
Bk79	KDRGEDL	-0.430853
Bk79	NNKGEKL	-1.14143
Bk79	KSKSEDS	-0.218285
Bk79	KDESEDS	-0.113565
Bk79	KDKNEKL	-0.259219
Bk79	NSESETS	-0.608275
Bk79	KNKSEDS	-0.187435
Bk79	NNENKKS	-0.968674
Bk79	NNESKTS	-0.807238
Bk79	NNRGKTS	-0.870229
Bk79	KNESEKS	-0.281268
Bk79	KDEGETL	-0.2096
Bk79	NNKGKKS	-0.829957
Bk79	KNRNKDS	-0.761977
Bk79	KDESKES	0.106051
Bk79	NSRGEKS	-0.775007
Bk79	NSKGEEL	-0.548103
Bk79	KDKSKKS	-1.06841
Bk79	KSKNETL	-0.547987
Bk79	NNENKES	-1.37494
Bk79	NDEGKKL	-0.382516
Bk79	KNKSEKS	-1.26905
Bk79	KNKNEDS	-0.138765
Bk79	NSRNKTL	-0.923314
Bk79	KSRNKTS	-1.02201
Bk79	KDKNEEL	-0.199324
Bk79	NNRGEDL	-0.381487
Bk79	NNEGKKS	-1.43144
Bk79	KDRGKEL	-0.700367
Bk79	NSEGETS	-0.764391
Bk79	KSKSKKL	-1.09311
Bk79	NNRNETL	-0.227627
Bk79	KSKNKKS	-0.755421
Bk79	KSKNKTL	-1.12649
Bk79	KDEGKKS	-0.306104
Bk79	NSENKDL	-0.676571
Bk79	KDESKTL	-0.3524
Bk79	NNRNETS	-0.41007
Bk79	NSKGEDL	-0.612548
Bk79	NSESEKS	-0.188966
Bk79	NSKNKEL	-0.122681
Bk79	KDKGEES	-0.479026
Bk79	KSKSETS	-0.979213
Bk79	NDKNKDL	-0.193053
Bk79	NNENKEL	-0.893114
Bk79	NSENEKL	-0.175394
Bk79	KSENEDS	-0.825992
Bk79	NDRGETL	-0.340382
Bk79	NNKNKDL	-0.664633
Bk79	KNENEES	-0.529226
Bk79	KDKGKES	-0.733913
Bk79	NNKNKTL	-1.11466
Bk79	NDEGEKL	-0.418182
Bk79	NNEGEKL	-0.506382
Bk79	NNRGKEL	-0.976764
Bk79	KSEGKES	-1.20188
Bk79	NSKSKES	-0.84966
Bk79	KNRSEES	0.123426
Bk79	NSRGEDS	-0.38358
Bk79	NDESKKS	-0.172237
Bk79	NDENETS	-0.906854
Bk79	KNRGKDL	-1.01666
Bk79	NSEGEKL	-0.451913
Bk79	NNRSEKS	-0.169743
Bk79	NDKSEES	0.0589933
Bk79	KNKSEKL	-0.505837
Bk79	NDRNEES	-0.236356
Bk79	KSRGKTS	-1.11006
Bk79	NNKNKEL	-1.19874
Bk79	NSENETS	0.0112651
Bk79	NDKGKTL	-0.559364
Bk79	NNESKDS	-0.386894
Bk79	KDKGKDL	-0.93328
Bk79	NDRGEKL	-0.497394
Bk79	NSRGKTS	-1.05375
Bk79	KNKSEDL	-0.219973
Bk79	NDKNEDL	0.133937
Bk79	NSRSEDS	0.186345
Bk79	KNENEKS	0.0757814
Bk79	NSEGKDL	-0.950807
Bk79	KNRNETL	-0.399103
Bk79	KNRGETL	-0.72999
Bk79	KSESKTS	-0.615772
Bk79	KDRGKDS	-0.355628
Bk79	NSKSEES	0.18931
Bk79	KNENEDS	-0.63664
Bk79	NDESEDL	-0.389448
Bk79	KSEGETL	-0.529853
Bk79	NNEGEDS	-0.755226
Bk79	NSENKES	-0.919114
Bk79	KNKGEKS	-1.15618
Bk79	NNKNKKS	-1.04122
Bk79	NSKGKTL	-1.45847
Bk79	NSKGEKS	-0.928069
Bk79	KNRNKKS	-0.94834
Bk79	KSENETS	-0.463289
Bk79	NDKGEES	0.246914
Bk79	KDEGKTL	-0.511675
Bk79	NNKGEES	-0.325962
Bk79	KSEGKKL	-0.932208
Bk79	NDRSETS	0.0835819
Bk79	NDESEEL	-0.282582
Bk79	NSKNKDS	-0.440679
Bk79	KNRNKTL	-1.25209
Bk79	KSKSKTS	-0.783046
Bk79	NDRSKDS	0.619023
Bk79	NSKNETS	-0.0131779
Bk79	NNEGEDL	-0.423223
Bk79	NNKNEDL	-0.244707
Bk79	KNRGKTS	-1.03608
Bk79	NNRNEEL	0.199743
Bk79	NSESEDS	-0.505895
Bk79	NDRSETL	-0.172508
Bk79	NNRSKDS	-0.293902
Bk79	KSKGKDS	-1.03082
Bk79	NNENKDL	-0.695834
Bk79	KNKGETL	-0.803739
Bk79	NNKNKKL	-1.07851
Bk79	KDRGEEL	-0.31953
Bk79	KSENKDL	-0.383164
Bk79	KSRSEDL	-0.45048
Bk79	NDRSKES	-0.237447
Bk79	KDENETL	-0.110201
Bk79	KNEGEEL	-0.764527
Bk79	KDKGKTS	-0.935488
Bk79	NSRSETS	-0.104505
Bk79	KSRNETS	-0.371312
Bk79	KNESEDS	-0.427002
Bk79	NSEGKDS	-1.01305
Bk79	KSEGKTS	-1.05847
Bk79	KNEGKEL	-0.864963
Bk79	KDRSKTS	-1.01812
Bk79	KNRGEDS	-0.655586
Bk79	NSKSETS	0.375063
Bk79	NSKSKKL	-1.03367
Bk79	KDENEES	-0.552056
Bk79	KNESKKL	-1.15822
Bk79	NNKSKKS	-1.01337
Bk79	KDKNKKL	-0.681747
Bk79	KSKGKKL	-0.962644
Bk79	KDRNKES	-0.443758
Bk79	NNRSKTL	-1.29832
Bk79	NDRSEDS	0.130201
Bk79	NDRGKKS	-0.886424
Bk79	KSRGEDS	-0.491786
Bk79	KNEGEKS	-0.000525663
Bk79	KSESEDL	-0.386433
Bk79	NDRNKKS	-0.984307
Bk79	NNENEEL	-0.890177
Bk79	KDESKDL	-0.0537055
Bk79	NSENKEL	-1.27877
Bk79	KSRNEDL	0.0788525
Bk79	KSEGKDS	-0.588427
Bk79	KNRGKKL	-0.944949
Bk79	KNESKKS	-0.503998
Bk79	KSENEES	-0.737268
Bk79	KNKSEEL	-0.212319
Bk79	KNKGKDL	-1.16096
Bk79	NSRGEEL	-0.358061
Bk79	KNKNKDL	-0.807459
Bk79	KNKNKES	-0.951677
Bk79	KDEGEDS	-0.47954
Bk79	KNRGKKS	-1.25331
Bk79	NDKNETS	-0.757291
Bk79	NNKGKEL	-0.911781
Bk79	NSESEKL	-0.365581
Bk79	KDKGKKL	-1.20096
Bk79	KSRNEKL	-0.507208
Bk79	NSESKKS	-0.867645
Bk79	NDRGKTS	0.0783904
Bk79	NNRSETL	-0.433919
Bk79	NNENETS	-0.571539
Bk79	KNRNKTS	-1.01951
Bk79	KDRGEKS	-0.890329
Bk79	NSKNKES	-0.833829
Bk79	KSRSKDS	-0.763434
Bk79	KNRGEES	-0.281001
Bk79	NSENKTS	-0.803951
Bk79	NSESKTS	-1.03226
Bk79	NSRSKKS	-1.09686
Bk79	NDRNETL	-0.217185
Bk79	NNESKKL	-0.943459
Bk79	NNENEDS	-0.945474
Bk79	NNRSEKL	-0.247106
Bk79	KDEGEEL	-0.35993
Bk79	KDESETL	-0.410283
Bk79	KNESKES	-0.548892
Bk79	NDKSEEL	-0.203869
Bk79	NSKNEKS	-0.317075
Bk79	KSENKEL	-0.922916
Bk79	NDRGEES	-0.217996
Bk79	KNESKTL	-1.02815
Bk79	NSENEEL	-1.01958
Bk79	KDRSKKS	-1.021
Bk79	KSEGKDL	-0.97836
Bk79	KSRNEEL	-0.358311
Bk79	KNKSKKS	-0.873571
Bk79	NSEGKEL	-1.14558
Bk79	NSEGKTS	-1.10078
Bk79	NDEGKKS	-0.426856
Bk79	NSRGEKL	-0.76408
Bk79	KDKNKES	-0.248722
Bk79	KSESKTL	-0.637673
Bk79	NNKGEEL	-0.812553
Bk79	NSRSKDL	-0.446909
Bk79	KSKSKDL	-0.511073
Bk79	NSRSETL	-0.166706
Bk79	KDRSETL	-0.274002
Bk79	KDRSEDS	0.0519265
Bk79	KNKGKDS	-0.820095
Bk79	NSKNKKS	-1.05172
Bk79	KDENKTS	-0.319937
Bk79	KSESETL	-0.610505
Bk79	KSKGEKS	-1.32265
Bk79	KNRGEDL	-0.732523
Bk79	NSEGEDL	-1.20184
Bk79	NNEGKDL	-1.1397
Bk79	KNEGKES	-1.193
Bk79	NDESKDL	-0.37734
Bk79	NSRNKKL	-0.936945
Bk79	NSRNEKL	-0.104251
Bk79	KDRNEES	0.0302521
Bk79	NDKNKKS	-0.511694
Bk79	NNKSKTS	-0.87463
Bk79	NDRNKTS	-0.489555
Bk79	NDRNEEL	0.222677
Bk79	NDRSEDL	-0.0454971
Bk79	NNENEES	-1.1938
Bk79	KNKSEES	0
Bk79	NNENKDS	-0.939791
Bk79	NDRSKTS	-0.441393
Bk79	KDKSKTL	-0.510431
Bk79	KDEGEKL	-0.30273
Bk79	NNKSKEL	-0.680389
Bk79	KSRGETS	-0.505009
Bk79	KSKSEES	-0.289958
Bk79	KDRGKTL	-1.14708
Bk79	KDESEEL	-0.504343
Bk79	KSESEKS	0.12375
Bk79	KNRNKES	-0.839986
Bk79	NDRNEDS	0.315167
Bk79	KSKSKTL	-1.12611
Bk79	KSESKDS	-0.488633
Bk79	KDRGEKL	-0.670485
Bk79	KDRSEES	0.180204
Bk79	KDRSETS	0.0385524
Bk79	KSRGKEL	-1.06499
Bk79	NDENEKS	0.0392535
Bk79	NNRGEEL	-0.379399
Bk79	KDRNKKS	-0.726185
Bk79	NDKNEEL	0.124939
Bk79	KDRSKEL	-0.531267
Bk79	KDRSKDL	-0.339373
Bk79	KSENKDS	-0.436163
Bk79	NDENKTL	-0.603675
Bk79	NSKSEDS	0.214524
Bk79	KNRSKES	-0.739555
Bk79	NNRSEES	-0.213245
Bk79	NSRSEDL	-0.297479
Bk79	NDKNETL	-0.362401
Bk79	KSEGKEL	-1.36988
Bk79	KNKNEES	-0.137244
Bk79	NNRSKES	-1.15281
Bk79	NNKSEES	-0.179782
Bk79	NSRSKTL	-0.988721
Bk79	KSEGEEL	-0.643736
Bk79	KDRGKES	-0.512124
Bk79	NSENKKS	-0.712943
Bk79	KSKSEDL	-0.683977
Bk79	NNENEKS	-0.0958627
Bk79	NSKSKTL	-1.19969
Bk79	NDENEEL	-1.01882
Bk79	KNRGETS	-0.828272
Bk79	NNESEDL	-0.68552
Bk79	NDRGEEL	-0.583042
Bk79	NDESEKL	-0.427517
Bk79	NNKGEDL	-0.411802
Bk79	NNKNKDS	-0.378584
Bk79	KNKSKDS	-1.16618
Bk79	NDKNKEL	-0.373746
Bk79	NNKGKKL	-0.905461
Bk79	KSRSKES	-1.0588
Bk79	NNKSEKL	-0.0358471
Bk79	KNKGKKL	-1.03892
Bk79	KNEGKKS	-0.996921
Bk79	KSRNKKS	-1.08281
Bk79	KDESKEL	-0.327179
Bk79	KDKSETL	-0.0636771
Bk79	NDKGEKL	-1.26818
Bk79	NNRGEKL	-0.674038
Bk79	KSKSEKL	-0.525673
Bk79	KNENKDL	-0.491916
Bk79	NSRSKTS	-0.944038
Bk79	NSKNEES	-0.369879
Bk79	KSENEKS	0.024998
Bk79	KSKNEDL	-0.292008
Bk79	KNRNKDL	-0.712034
Bk79	KNESETL	-0.321558
Bk79	KDRSKES	-0.860119
Bk79	NSRGKDS	-0.812481
Bk79	KNRSKTS	-1.28522
Bk79	NDESKES	-0.538641
Bk79	KSRSEES	-0.373945
Bk79	KDESEKL	0.362038
Bk79	NDKSETS	0.124976
Bk79	KDRGKKS	-0.937304
Bk79	KDKNKTS	-0.881763
Bk79	NDRSKKS	-0.679589
Bk79	NDRGEKS	-0.384195
Bk79	NNKSKTL	-1.50771
Bk79	NNEGEKS	-0.628588
Bk79	NDRNKKL	-0.926121
Bk79	NDEGEES	-1.09093
Bk79	KSRNKTL	-1.14012
Bk79	KDEGKKL	-0.340703
Bk79	NDKNEDS	0.325244
Bk79	NDENETL	-0.512989
Bk79	KSRNEES	-0.211553
Bk79	KNRGEEL	-0.543576
Bk79	KNEGEES	-1.13555
Bk79	KSKNEKL	-0.955164
Bk79	NNENETL	-0.29638
Bk79	NDRNETS	-0.033982
Bk79	NNRGETL	-0.436185
Bk79	KNKNKKS	-1.08648
Bk79	NSESKDS	-0.245947
Bk79	NSRGKES	-1.03125
Bk79	NNENKTL	-0.957078
Bk79	NNRGKTL	-1.00999
Bk79	NSEGKTL	-1.17773
Bk79	NDKGKDL	-0.506684
Bk79	KSRSKDL	-1.00396
Bk79	NDRNKEL	-0.0870702
Bk79	KNRSETL	-0.531683
Bk79	NDRGKEL	-0.83127
Bk79	NNRNKEL	-0.572763
Bk79	KSKGEKL	-1.1842
Bk79	NNEGKTL	-0.553487
Bk79	NDRNKTL	-0.563309
Bk79	KNKNEEL	-0.326859
Bk79	NSRSKKL	-1.31547
Bk79	NDKGKKS	-1.05277
Bk79	KNRNEDL	-0.0474837
Bk79	NDKSKTS	-0.516027
Bk79	NDKSETL	-0.193188
Bk79	NSRGKKL	-0.593064
Bk79	KSENKKL	-0.83484
Bk79	KNRSKKS	-1.22212
Bk79	NNRGEES	0.106695
Bk79	NDENEDS	-1.05899
Bk79	NNRNEES	-0.303231
Bk79	NSENKDS	-0.611076
Bk79	NSKSEDL	-0.251028
Bk79	NDESKKL	-0.258962
Bk79	KSRNKES	-1.82132
Bk79	NDRSEKL	0.184179
Bk79	NSRGETL	-0.452253
Bk79	NSENEES	-0.249968
Bk79	KDRSKTL	-0.906101
Bk79	KSENETL	-0.663966
Bk79	NSRSKEL	-0.81756
Bk79	NNKGKES	-0.947295
Bk79	NNKNKTS	-0.947501
Bk79	NDKGEEL	-0.416658
Bk79	KDRNKEL	-0.286454
Bk79	KDKSKTS	-1.1188
Bk79	NNKSKES	-0.940339
Bk79	NSRNKEL	-0.771921
Bk79	KNENEDL	-0.686915
Bk79	KNKGEDL	-0.609373
Bk79	KNRSKDL	-0.960387
Bk79	KSRSEKL	-0.674785
Bk79	KNEGKDS	-0.493934
Bk79	KSESKKL	-0.954893
Bk79	KSRSKKL	-1.23223
Bk79	KNKNKEL	-0.950711
Bk79	KDEGEDL	-0.896574
Bk79	NSRSEKL	-0.033892
Bk79	KDENKDS	-0.0799165
Bk79	NSRSKES	-0.0677888
Bk79	NDRSKEL	0.126434
Bk79	KSEGETS	-0.228731
Bk79	KSEGEES	-0.661683
Bk79	KDKGETL	-1.03409
Bk79	KDRNEDL	0.115282
Bk79	KDKSKDS	-0.369754
Bk79	KSRGEEL	-0.621697
Bk79	KSKGETL	-0.920333
Bk79	NSESKDL	-0.403543
Bk79	NSRSKDS	-0.359058
Bk79	KSKSETL	-1.03243
Bk79	NDENKDS	0.0206548
Bk79	NNRGEDS	-0.293886
Bk79	NNRSKKL	-0.912554
Bk79	NSKSEKL	-0.333903
Bk79	NDRGEDS	-0.186006
Bk79	KNESEES	-0.296344
Bk79	NNRGKES	-0.650844
Bk79	KDRSKDS	0.0010132
Bk79	NDKGEDS	-0.49178
Bk79	NNRNKDS	-0.47523
Bk79	KSEGEKS	-0.241688
Bk79	NSRSEEL	-0.417789
Bk79	NDKSEDL	-0.0687561
Bk79	NSEGEKS	-0.722467
Bk79	KDRGKKL	-1.39551
Bk79	KDRSEDL	0.247847
Bk79	KDKNETS	-0.388882
Bk79	KSESETS	-0.515937
Bk79	NSKGKKS	-0.999158
Bk79	KSRGKDL	-1.01163
Bk79	NDKNKES	-0.273069
Bk79	NNKGKTS	-0.910672
Bk79	KDENEKL	0.277953
Bk79	NDEGKDL	-0.530112
Bk79	NNRNKDL	-0.388512
Bk79	KNRSEKS	-1.18922
Bk79	NDENKKL	-0.238768
Bk79	KNEGETL	-0.675991
Bk79	NNENEKL	0.175522
Bk79	KSKGEES	-0.851978
Bk79	KDKGKTL	-1.11498
Bk79	KDRGETL	-0.298483
Bk79	NSEGKKS	-0.898621
Bk79	NNRNKES	-0.992419
Bk79	NDEGKES	-0.880381
Bk79	NDKGEDL	-0.373799
Bk79	NDKNEKL	0.0549139
Bk79	NDEGKTS	-0.609578
Bk79	KSRGKDS	-0.88274
Bk79	KNKSETS	-0.532712
Bk79	NSENEDL	-1.05886
Bk79	KSKNEKS	-0.911625
Bk79	KNENEKL	0.152462
Bk79	KNEGEDS	-0.440361
Bk79	KDKNEKS	-0.219095
Bk79	KNRGKTL	-1.26636
Bk79	NSRNKES	-0.925494
Bk79	NSKSKTS	-0.711327
Bk79	NNESEDS	-0.315463
Bk79	NSKGKDL	-0.701938
Bk79	KNRNEEL	-0.112116
Bk79	NSKGEDS	-0.353925
Bk79	KNRNEKL	-0.606544
Bk79	NNESKEL	-0.574295
Bk79	KDRNKTS	-0.907639
Bk79	KDKSEKL	-0.412528
Bk79	KDRGEES	-0.261105
Bk79	NDKNKDS	0.693179
Bk79	KNKSKTS	-1.51042
Bk79	NNESETS	-0.587333
Bk79	NDRSKTL	-0.659983
Bk79	NSESKKL	-0.891357
Bk79	NSKNEDL	0.377811
Bk79	NSRGETS	-0.295011
Bk79	KSKNKDS	-0.997048
Bk79	KNKNETS	-0.717505
Bk79	KSKNKTS	-1.2556
Bk79	KNRGEKL	-0.908029
Bk79	NSRNETS	-0.489203
Bk79	NNESEKL	-0.0771109
Bk79	NSESEDL	-0.460082
Bk79	KNENKKS	-0.802567
Bk79	NDKGKEL	-0.782748
Bk79	NSKGKKL	-1.40583
Bk79	KSENKKS	-0.692573
Bk79	KNEGKDL	-0.957629
Bk79	KSESKES	-0.368114
Bk79	KNKSKES	-0.76016
Bk79	NDENKTS	-0.283895
Bk79	NDKSKES	-0.207356
Bk79	KDKSEDS	0.131305
Bk79	KDRNEKL	0.0426763
Bk79	NSKGEKL	-1.10109
Bk79	KSRGEKL	-1.28331
Bk79	KSRNEDS	-0.488871
Bk79	KSRNKDS	-0.692805
Bk79	NSKNKTS	-0.914809
Bk79	KDRNETL	-0.201067
Bk79	NNKGKDL	-0.936612
Bk79	KNRNEES	-0.164246
Bk79	KNESEEL	-0.340187
Bk79	KSKSKEL	-0.766221
Bk79	NDKSKEL	-0.470167
Bk79	NSESEES	-0.606689
Bk79	KSKSKDS	-1.02717
Bk79	NSESKTL	-1.01433
Bk79	NDRSEES	-0.110908
Bk79	NNENEDL	-0.843909
Bk79	KDENEKS	0.381358
Bk79	KSEGEDL	-0.873344
Bk79	KNKGEEL	-0.708383
Bk79	KSENKTL	-0.876629
Bk79	KNEGKTL	-0.959908
Bk79	NDKGKKL	-0.964335
Bk79	NNRNEDL	0.292564
Bk79	KNENETL	-0.463928
Bk79	KNRGKEL	-1.22768
Bk79	KDKGEKS	-1.29049
Bk79	KNKGKEL	-0.869526
Bk79	KSKSEEL	-0.363444
Bk79	NDESETS	-0.419087
Bk79	KNRNEKS	-0.588384
Bk79	NNRNEDS	0.163952
Bk79	KSESKKS	-1.16359
Bk79	KSKNETS	-0.617493
Bk79	KSESEKL	0.171042
Bk79	KDKGETS	-0.910641
Bk79	KDKSKEL	-0.763911
Bk79	NSEGEES	-1.20073
Bk79	NNRSETS	0.264856
Bk79	KSKNEEL	0.0196778
Bk79	NNESEKS	-0.234665
Bk79	KDENEDL	-0.285249
Bk79	NSKNKTL	-0.933358
Bk79	KDESEDL	-0.211301
Bk79	KDEGKES	-0.404559
Bk79	NNRSKDL	-0.487445
Bk79	KSKNKEL	-0.955578
Bk79	KNEGKTS	-0.704105
Bk79	NNESEEL	-0.594561
Bk79	KNKNKTS	-1.088
Bk79	NSKGETL	-0.81357
Bk79	NDENKKS	-0.480378
Bk79	NSKNEEL	-0.266753
Bk79	NNRGKDL	-0.874326
Bk79	KNRGKES	-1.08745
Bk79	NDEGEKS	-0.453261
Bk79	KNRNKEL	-1.12371
Bk79	NSRNKKS	-1.00734
Bk79	NNEGEES	-0.888926
Bk79	NDRGKTL	-0.785514
Bk79	NNKSKDS	-0.590844
Bk79	KNKSKEL	-0.811757
Bk79	NNESEES	-0.39774
Bk79	KDEGEES	-0.469774
Bk79	NDESKDS	0.0369148
Bk79	KDKNKDS	-0.553246
Bk79	NNESETL	-0.642779
Bk79	NNRGKKS	-0.779664
Bk79	KDEGKDL	-0.28653
Bk79	NDKGKDS	-0.369547
Bk79	NDKSEKL	-0.174491
Bk79	NDESKEL	-0.800319
Bk79	NNEGKEL	-0.683738
Bk79	NSESETL	-0.855777
Bk79	KDKGEDS	-0.365378
Bk79	KNRNEDS	0.0804291
Bk79	NNKNEEL	-0.0570126
Bk79	KSKNEDS	0.133389
Bk79	NSKSKDS	-0.46743
Bk79	NDKSKDS	-0.146747
Bk79	NDKNKTL	-0.583314
Bk79	KDKSEKS	-0.306864
Bk79	KSKGEDL	-0.670633
Bk79	KNENKTS	-0.953147
Bk79	NNEGKDS	-0.929432
Bk79	NDRGETS	-0.229098
Bk79	NDKNKTS	-0.622367
Bk79	KNRNKKL	-1.14093
Bk79	KDESEKS	-0.339511
Bk79	NSKNEDS	-0.154607
Bk79	KDRGKTS	-0.992594
Bk79	KDKSEEL	-0.0813501
Bk79	NNKGETS	-0.743214
Bk79	KDRGETS	-0.227984
Bk79	KSKGKES	-1.29351
Bk79	NNKNEKL	-0.533383
Bk79	KDENKDL	0.0323966
Bk79	NSRNKDS	-0.388787
Bk79	NNRGKKL	-1.32291
Bk79	KNENKKL	-0.830887
Bk79	NNEGETL	-0.264593
Bk79	KSENEDL	-0.596237
Bk79	KNESKEL	-1.15428
Bk79	KDENEDS	-0.524747
Bk79	KSKGETS	-1.19594
Bk79	NSRNEES	0.00308954
Bk79	KSKGKTL	-1.23718
Bk79	KDRNEDS	0.19373
Bk79	NSRSEKS	0.294295
Bk79	NDRGKES	-0.44283
Bk79	NNEGKKL	-0.938854
Bk79	NSKSEEL	-0.075261
Bk79	KDRNKDL	-0.0424378
Bk79	KDKSKDL	-0.533028
Bk79	KSENEKL	-0.0965415
Bk79	NSRGEES	-0.386081
Bk79	NDENKES	-0.672144
Bk79	KSKSKKS	-1.15927
Bk79	KDKNKKS	-0.940725
Bk79	NNRSEDL	-0.226113
Bk79	KNESEDL	-0.51248
Bk79	KNKGEDS	-0.69285
Bk79	NSESKES	-0.679858
Bk79	KDRNKDS	-0.338148
Bk79	NDEGKTL	-1.13921
Bk79	KDESKKL	-0.558489
Bk79	NDKSKKS	-1.03507
Bk79	KNENKEL	-0.548633
Bk79	KDEGKTS	-0.454379
Bk79	KDKNEDS	0.163618
Bk79	NNKNEDS	-0.183892
Bk79	NNKNEES	0.0959024
Bk79	KSEGKTL	-1.06484
Bk79	NDESKTL	-0.704839
Bk79	NNRNEKL	-0.226397
Bk79	NNRGETS	-0.229042
Bk79	KNKSKKL	-1.2828
Bk79	KSRGKTL	-1.23789
Bk79	KNKGKKS	-1.30192
Bk79	KNKSETL	-1.05784
Bk79	KNEGEKL	-0.32056
Bk79	KDKSKES	-0.457185
Bk79	KNENKDS	-0.442282
Bk79	NDEGKDS	-0.503271
Bk79	NNKSKDL	-0.461262
Bk79	NDRGKDL	-0.336586
Bk79	NSESEEL	-0.773852
Bk79	KSRSEKS	-1.18149
Bk79	NSKGKEL	-1.08318
Bk79	NDESEDS	0.13651
Bk79	KDEGEKS	-0.41293
Bk79	NSEGEEL	-0.834147
Bk79	NDKNKKL	-0.602498
Bk79	KSRNEKS	-0.899046
Bk79	KNRGKDS	-0.579019
Bk79	NDKSEKS	-0.477622
Bk79	NNEGETS	-1.18935
Bk79	NDRNKDS	0.321196
Bk79	KNESETS	-0.331495
Bk79	KNKSKDL	-1.18287
Bk79	KNKNEKS	-0.969514
Bk79	NNKGKTL	-0.924898
Bk79	NSRSEES	-0.0881792
Bk79	NNESKTL	-0.592556
Bk79	KNRSEDS	0.0325155
Bk79	NSRGEDL	-0.557021
Bk79	KNRNETS	-0.553981
Bk79	KNEGEDL	-0.845699
Bk79	NSENKTL	-0.868817
Bk79	KSENKTS	-0.617901
Bk79	KNKGKES	-0.933865
Bk79	KSKGEEL	-0.599667
Bk79	NSRNEEL	-0.0280278
Bk79	NSKNKKL	-0.864063
Bk79	NSRNETL	-0.134444
Bk79	KDRNEKS	-0.305523
Bk79	NSRNEKS	-0.103384
Bk79	KSESEES	-0.518435
Bk79	NDKGETS	-0.075287
Bk79	KNKGETS	-0.923522
Bk79	KNRSKEL	-0.903285
Bk79	KDENKES	-0.108745
Bk79	NNKNETS	-0.608295
Bk79	NNKSEDS	-0.18855
Bk79	KDEGETS	-0.564351
Bk79	KSKGKTS	-1.2545
Bk79	KSRNKDL	-0.871267
Bk79	KNENKTL	-0.996622
Bk79	KDEGKDS	-0.0806762
Bk79	NSENETL	-0.569879
Bk79	KDKGKDS	-0.450017
Bk79	KDENETS	-0.393347
Bk79	NNRSKEL	-0.816114
Bk79	KSRGKKL	-1.12581
Bk79	KDRNEEL	0.263151
Bk79	NSRNEDS	-0.0888301
Bk79	NSKGEES	-0.416539
Bk79	KSKSKES	-0.794337
Bk79	KDENKEL	-0.347919
Bk79	NNRSEEL	0.23394
Bk79	KSRSKTL	-1.22198
Bk79	NSKGETS	-0.48185
Bk79	NDKNEKS	-0.546305
Bk79	NDRSEEL	0.0862083
Bk79	NDENEES	-0.725005
Bk79	KDESKKS	-0.381373
Bk79	NNRSEDS	0.276427
Bk79	NNKGEDS	-0.156464
Bk79	KNRSEKL	-0.690621
Bk79	KSRNKEL	-0.953898
Bk79	NNEGKES	-0.996107
Bk79	KSEGEDS	-0.609538
Bk79	NSKNEKL	-0.470838
Bk79	NNKGETL	-0.485597
Bk79	KSRSEEL	-0.150016
Bk79	NNKGKDS	-0.986181
Bk79	NNESKKS	-0.940046
Bk79	KNEGETS	-0.377186
Bk79	NDKSKKL	-1.08807
Bk79	KSRNKKL	-0.876115
Bk79	KDKGEEL	-0.579267
Bk79	NNKSKKL	-1.40314
Bk79	NSKGKDS	-0.767358
Bk79	NNRNKTS	-1.17904
Bk79	NDKGETL	-0.120622
Bk79	NDKSEDS	0.138262
Bk79	NDRNEDL	0.158193
Bk79	KDKGKKS	-1.04422
Bk79	KSRSEDS	0.103662
Bk79	KNRSKKL	-1.11122
Bk79	KDKNKEL	-0.62537
Bk79	NSEGKES	-1.01176
Bk79	NDEGETL	-1.10252
Bk79	KNRSKDS	-0.487968
Bk79	KSRGEDL	-0.602045
Bk79	KNRSEDL	-0.134146
Bk79	KDKSEDL	-0.0625583
Bk79	NDRNEKS	-0.0998352
Bk79	KDENEEL	-0.161553
Bk79	KNENETS	-0.292766
Bk79	NNKNKES	-1.19113
Bk79	NNKSEDL	-0.21731
Bk79	NNRGKDS	-0.791579
Bk79	KDKGEKL	-1.16442
Bk79	NSKSEKS	-4.19718e-05
Bk79	KSRGKES	-1.24315
Bk79	KDRNKKL	-0.955127
Bk79	NDEGEDL	-0.962325
Bk79	NDEGEDS	-1.04831
Bk79	KNRGEKS	-1.3368
Bk79	KSKNEES	-0.0364752
Bk79	NNESKES	-0.683551
Bk79	NSRGKDL	-0.799684
Bk79	NDEGKEL	-0.902363
Bk79	KSRSKTS	-1.06339
Bk79	KNESEKL	-0.0720285
Bk79	KDKSETS	-0.427574
Bk79	KNRSEEL	-0.230534
Bk79	NDENEDL	-0.737879
Bk79	NNKSETL	-0.277942
Bk79	KNKSKTL	-1.56364
Bk79	KDKNETL	-0.125243
Bk79	KDKSKKL	-1.05217
Bk79	KDESKDS	0.159982
Bk79	KNKNKDS	-1.02945
Bk79	NDRGKDS	0.0102802
Bk79	KSRGKKS	-0.852647
Bk79	NSKSKDL	-0.645446
Bk79	KDRSEEL	-0.20959
Bk79	NSKSKKS	-1.13605
Bk79	KDRNKTL	-1.02172
Bk79	NNKGEKS	-1.07197
Bk79	KNKNETL	-0.733021
Bk79	KSRSKKS	-1.83972
Bk79	KSKSEKS	-0.80092
Bk79	NNRNKKS	-0.958364
Bk79	NDRNEKL	0.202373
Bk79	NSKGKES	-0.60449
Bk79	NNRNKTL	-0.952012
Bk79	KDKNEDL	0.551945
Bk79	NSRNKDL	-0.201903
Bk79	KNKGKTL	-1.23761
Bk79	KSRGEKS	-1.04181
Bk79	KNRSETS	-0.831381
Bk79	NSKNETL	-0.377476
Bk79	NDRGEDL	-0.511451
Bk79	NSRGKTL	-1.1669
Bk79	NDESEKS	0.185762
Bk79	KSEGEKL	-0.266237
Bk79	NNKNETL	-0.308568
Bk79	NSRGKEL	-0.924505
Bk79	KDRGKDL	-0.592547
Bk79	KSESEDS	-0.276283
Bk79	KDKNEES	-0.172091
Bk79	NNESKDL	-0.812845
Bk79	KDKGKEL	-0.723254
Bk79	NSRGKKS	-1.18371
Bk79	KDKNKTL	-0.74703
Bk79	KNESKDS	-0.253718
Bk79	NSKGKTS	-1.16993
Bk79	KSENEEL	-0.910778
Bk79	NDRNKES	-0.0261444
Bk79	NSENKKL	-0.855518
Bk79	NDESETL	-0.380336
Bk79	NNKNEKS	-0.774038
Bk79	NDESKTS	-0.285593
Bk79	KSRNETL	-0.422396
Bk79	NNKSEEL	-0.201708
Bk79	KNESKDL	-0.371569
Bk79	KSKGKDL	-0.947589
Bk79	KDKSEES	-0.338439
Bk79	NNENKTS	-0.924076
Bk79	NDKGKES	-0.666204
Bk79	NDENEKL	0.165772
Bk79	KSRSKEL	-0.601938
Bk79	KNKNEDL	0.075673
Bk79	NDKGEKS	-1.17216
Bk79	NDKSKTL	-0.772145
Bk79	NDKGKTS	-0.854759
Bk79	NSKNKDL	-0.455754
Bk79	NDESEES	-0.567248
Bk79	KNESKTS	-1.05668
Bk79	KNENEEL	-0.202078
Bk79	KSKNKKL	-0.95644
Bk79	NSRNKTS	-1.08244
Bk79	NSESKEL	-0.62921
Bk79	KSKGKKS	-1.05724
Bk79	NNRGEKS	-0.693282
Bk79	NDRSKKL	-1.06005
Bk79	NDKNEES	-0.0778625
Bk79	KSKGKEL	-1.05851
Bk79	NDRGKKL	-0.825202
Bk79	NNKSEKS	-0.380864
Bk79	NSENEDS	-0.941896
Bk79	NDRSKDL	0.17396
Bk79	KNRSKTL	-1.08665
Bk79	KNKNEKL	-0.530316
Bk79	KNKGEES	-0.769471
Bk79	NNEGEEL	-1.02588
Bk79	KNKNKKL	-1.21908
Bk79	NSEGKKL	-0.172243
Bk79	KDKNKDL	-0.172384
Bk79	NSEGEDS	0.129845
Bk79	KSESEEL	-0.492649
Bk79	KNKNKTL	-0.861328
Bk79	NNENKKL	-0.68617
Bk79	KDRNETS	-0.133386
Bk79	KSKGEDS	-0.629253
Bk79	KSENKES	-0.747427
Bk79	NNRNKKL	-0.975054
Bk79	KNKGEKL	-1.21708
Bk79	NDKSKDL	-0.176748
Bk79	KNENKES	-0.8728
Bk79	KDESKTS	-0.483052
Bk79	KNKGKTS	-1.17096
Bk79	NSEGETL	-1.03791
Bk79	NDENKDL	-0.00250049
Bk79	NSENEKS	-0.264202
Bk79	KDENKTL	-0.512348
Bk79	KDRSEKS	-0.125066
Bk79	NSRNEDL	-0.0729874
Bk79	NDEGETS	-0.694627
Bk79	NNKSETS	-0.291999
Bk79	KDEGKEL	-0.763377
Bk79	KSKNKES	-1.25539
Bk79	NSKSKEL	-1.18276
Bk79	KSRGETL	-0.980832
Bk79	KDRSEKL	0.00207821
Bk79	KDENKKS	-0.255058
Bk79	KDKGEDL	-0.22971
Bk79	NDRNKDL	-0.0877904
Bk79	KSRSETS	0.0246768
Bk79	NNRSKKS	-0.971821
Bei89	NDEGEEL	-0.675186
Bei89	KNEGKKL	-0.81167
Bei89	KSRGEES	-0.291826
Bei89	NNRSKTS	-0.946015
Bei89	NNRNEKS	-0.38486
Bei89	KDRGEDS	-0.200305
Bei89	KSKNKDL	-0.812183
Bei89	KDRSKKL	-1.05069
Bei89	NDENKEL	-0.383758
Bei89	NNEGKTS	-0.878949
Bei89	KSEGKKS	-0.839423
Bei89	KSESKDL	0.234051
Bei89	NSKSETL	0.0229718
Bei89	KDESEES	0.314448
Bei89	KSRSETL	-0.492255
Bei89	KDENKKL	-0.708504
Bei89	NDRSEKS	-0.387008
Bei89	KSESKEL	-0.11656
Bei89	KDESETS	0.501203
Bei89	KDRGEDL	-0.0130304
Bei89	NNKGEKL	-0.614184
Bei89	KSKSEDS	0.685882
Bei89	KDESEDS	0.366546
Bei89	KDKNEKL	-0.52145
Bei89	NSESETS	0.352717
Bei89	KNKSEDS	0.23113
Bei89	NNENKKS	-0.854928
Bei89	NNESKTS	-0.383718
Bei89	NNRGKTS	-1.16617
Bei89	KNESEKS	0.530961
Bei89	KDEGETL	-0.241019
Bei89	NNKGKKS	-1.02039
Bei89	KNRNKDS	-0.614094
Bei89	KDESKES	0.0540318
Bei89	NSRGEKS	-1.11915
Bei89	NSKGEEL	-0.249
Bei89	KDKSKKS	-1.10099
Bei89	KSKNETL	0.378456
Bei89	NNENKES	-0.749135
Bei89	NDEGKKL	-0.920275
Bei89	KNKSEKS	-0.482155
Bei89	KNKNEDS	0.356636
Bei89	NSRNKTL	-0.634519
Bei89	KSRNKTS	-0.773431
Bei89	KDKNEEL	0.516762
Bei89	NNRGEDL	0.238954
Bei89	NNEGKKS	-0.89564
Bei89	KDRGKEL	-0.859926
Bei89	NSEGETS	0.0236617
Bei89	KSKSKKL	-1.29626
Bei89	NNRNETL	0.518415
Bei89	KSKNKKS	-0.906003
Bei89	KSKNKTL	-0.737285
Bei89	KDEGKKS	-0.974515
Bei89	NSENKDL	-0.130639
Bei89	KDESKTL	-0.334498
Bei89	NNRNETS	0.406633
Bei89	NSKGEDL	-0.20563
Bei89	NSESEKS	0.178642
Bei89	NSKNKEL	-0.62458
Bei89	KDKGEES	0.0410427
Bei89	KSKSETS	-0.5313
Bei89	NDKNKDL	0.12507
Bei89	NNENKEL	-0.814478
Bei89	NSENEKL	-0.189825
Bei89	KSENEDS	0.162079
Bei89	NDRGETL	-0.733789
Bei89	NNKNKDL	-0.104351
Bei89	KNENEES	-0.0228157
Bei89	KDKGKES	-0.836765
Bei89	NNKNKTL	-0.496838
Bei89	NDEGEKL	-0.271041
Bei89	NNEGEKL	0.025961
Bei89	NNRGKEL	-0.517207
Bei89	KSEGKES	-0.703883
Bei89	NSKSKES	-0.855195
Bei89	KNRSEES	0.367875
Bei89	NSRGEDS	0.278397
Bei89	NDESKKS	-0.970948
Bei89	NDENETS	0.230341
Bei89	KNRGKDL	-0.695326
Bei89	NSEGEKL	-0.434208
Bei89	NNRSEKS	-0.743663
Bei89	NDKSEES	0.425644
Bei89	KNKSEKL	-0.316844
Bei89	NDRNEES	0.463067
Bei89	KSRGKTS	-1.03982
Bei89	NNKNKEL	-0.418843
Bei89	NSENETS	0.23144
Bei89	NDKGKTL	-1.10076
Bei89	NNESKDS	0.214411
Bei89	KDKGKDL	-0.51442
Bei89	NDRGEKL	-0.599346
Bei89	NSRGKTS	-1.22533
Bei89	KNKSEDL	0.399745
Bei89	NDKNEDL	0.567478
Bei89	NSRSEDS	0.563157
Bei89	KNENEKS	0.380776
Bei89	NSEGKDL	-0.609572
Bei89	KNRNETL	0.388179
Bei89	KNRGETL	-0.681418
Bei89	KSESKTS	-0.838797
Bei89	KDRGKDS	-0.808852
Bei89	NSKSEES	0.398428
Bei89	KNENEDS	0.00877739
Bei89	NDESEDL	-0.00593595
Bei89	KSEGETL	-0.0287519
Bei89	NNEGEDS	-0.396827
Bei89	NSENKES	-0.440242
Bei89	KNKGEKS	-0.883808
Bei89	NNKNKKS	-0.847941
Bei89	NSKGKTL	-1.10007
Bei89	NSKGEKS	-0.798948
Bei89	KNRNKKS	-1.02816
Bei89	KSENETS	0.564052
Bei89	NDKGEES	-0.0709643
Bei89	KDEGKTL	0.12058
Bei89	NNKGEES	0.054757
Bei89	KSEGKKL	-1.1499
Bei89	NDRSETS	-0.00100297
Bei89	NDESEEL	0.114206
Bei89	NSKNKDS	-0.515202
Bei89	KNRNKTL	-0.720978
Bei89	KSKSKTS	-0.949762
Bei89	NDRSKDS	-0.415928
Bei89	NSKNETS	0.801732
Bei89	NNEGEDL	-0.450638
Bei89	NNKNEDL	0.49732
Bei89	KNRGKTS	-1.21015
Bei89	NNRNEEL	0.34066
Bei89	NSESEDS	0.0424725
Bei89	NDRSETL	-0.49231
Bei89	NNRSKDS	-0.540079
Bei89	KSKGKDS	-0.765064
Bei89	NNENKDL	-0.334571
Bei89	KNKGETL	-0.204641
Bei89	NNKNKKL	-1.01568
Bei89	KDRGEEL	0.0487124
Bei89	KSENKDL	-0.0392787
Bei89	KSRSEDL	0.184823
Bei89	NDRSKES	-0.552398
Bei89	KDENETL	0.433715
Bei89	KNEGEEL	-0.370313
Bei89	KDKGKTS	-0.851651
Bei89	NSRSETS	-0.172772
Bei89	KSRNETS	0.31565
Bei89	KNESEDS	0.416763
Bei89	NSEGKDS	-0.500977
Bei89	KSEGKTS	-0.72893
Bei89	KNEGKEL	-0.78267
Bei89	KDRSKTS	-1.1532
Bei89	KNRGEDS	-0.212502
Bei89	NSKSETS	0.0144826
Bei89	NSKSKKL	-0.955385
Bei89	KDENEES	-0.0115975
Bei89	KNESKKL	-0.865721
Bei89	NNKSKKS	-1.03821
Bei89	KDKNKKL	-0.96352
Bei89	KSKGKKL	-1.18328
Bei89	KDRNKES	-0.751573
Bei89	NNRSKTL	-0.929713
Bei89	NDRSEDS	-0.02879
Bei89	NDRGKKS	-1.15984
Bei89	KSRGEDS	-0.0626911
Bei89	KNEGEKS	-0.0980634
Bei89	KSESEDL	0.412964
Bei89	NDRNKKS	-0.946122
Bei89	NNENEEL	-0.220795
Bei89	KDESKDL	0.231205
Bei89	NSENKEL	-0.675158
Bei89	KSRNEDL	0.0837845
Bei89	KSEGKDS	-0.26671
Bei89	KNRGKKL	-0.892046
Bei89	KNESKKS	-0.894221
Bei89	KSENEES	0.366791
Bei89	KNKSEEL	0.567069
Bei89	KNKGKDL	-0.76688
Bei89	NSRGEEL	-0.0693
Bei89	KNKNKDL	-0.466472
Bei89	KNKNKES	-0.774486
Bei89	KDEGEDS	0.297097
Bei89	KNRGKKS	-0.96418
Bei89	NDKNETS	0.707065
Bei89	NNKGKEL	-0.481255
Bei89	NSESEKL	-0.0887234
Bei89	KDKGKKL	-1.07452
Bei89	KSRNEKL	-0.728824
Bei89	NSESKKS	-0.848033
Bei89	NDRGKTS	-0.960831
Bei89	NNRSETL	-0.544002
Bei89	NNENETS	0.15219
Bei89	KNRNKTS	-0.930341
Bei89	KDRGEKS	-1.09431
Bei89	NSKNKES	-0.864049
Bei89	KSRSKDS	-1.00901
Bei89	KNRGEES	0.0907826
Bei89	NSENKTS	-0.239478
Bei89	NSESKTS	-0.699101
Bei89	NSRSKKS	-1.09902
Bei89	NDRNETL	0.589826
Bei89	NNESKKL	-0.927893
Bei89	NNENEDS	-0.233391
Bei89	NNRSEKL	-0.363011
Bei89	KDEGEEL	-0.186234
Bei89	KDESETL	0.101867
Bei89	KNESKES	0.193962
Bei89	NDKSEEL	0.116873
Bei89	NSKNEKS	-0.623689
Bei89	KSENKEL	-0.408123
Bei89	NDRGEES	0.0602651
Bei89	KNESKTL	-0.275584
Bei89	NSENEEL	-0.560892
Bei89	KDRSKKS	-0.978944
Bei89	KSEGKDL	-0.469439
Bei89	KSRNEEL	0.195974
Bei89	KNKSKKS	-0.650014
Bei89	NSEGKEL	-0.776832
Bei89	NSEGKTS	-1.02092
Bei89	NDEGKKS	-0.839355
Bei89	NSRGEKL	-0.960486
Bei89	KDKNKES	-0.590139
Bei89	KSESKTL	-0.719916
Bei89	NNKGEEL	0.0103642
Bei89	NSRSKDL	-0.751619
Bei89	KSKSKDL	-0.812008
Bei89	NSRSETL	-0.496095
Bei89	KDRSETL	-0.449402
Bei89	KDRSEDS	0.267328
Bei89	KNKGKDS	-0.810252
Bei89	NSKNKKS	-1.04365
Bei89	KDENKTS	0.340261
Bei89	KSESETL	0.208424
Bei89	KSKGEKS	-1.04594
Bei89	KNRGEDL	-0.275926
Bei89	NSEGEDL	-0.317357
Bei89	NNEGKDL	-0.784936
Bei89	KNEGKES	-0.507782
Bei89	NDESKDL	0.116271
Bei89	NSRNKKL	-1.07026
Bei89	NSRNEKL	-0.737289
Bei89	KDRNEES	0.484726
Bei89	NDKNKKS	-1.11393
Bei89	NNKSKTS	-0.762214
Bei89	NDRNKTS	-0.156801
Bei89	NDRNEEL	0.32241
Bei89	NDRSEDL	0.232098
Bei89	NNENEES	-0.497493
Bei89	KNKSEES	0.207049
Bei89	NNENKDS	-0.285489
Bei89	NDRSKTS	-1.03881
Bei89	KDKSKTL	-1.02465
Bei89	KDEGEKL	-0.0626525
Bei89	NNKSKEL	-0.424463
Bei89	KSRGETS	-0.937625
Bei89	KSKSEES	-0.0173977
Bei89	KDRGKTL	-1.00874
Bei89	KDESEEL	0.144755
Bei89	KSESEKS	-0.158626
Bei89	KNRNKES	-0.827386
Bei89	NDRNEDS	0.542968
Bei89	KSKSKTL	-1.1495
Bei89	KSESKDS	-0.288486
Bei89	KDRGEKL	-0.990587
Bei89	KDRSEES	-0.0246417
Bei89	KDRSETS	-0.2383
Bei89	KSRGKEL	-1.17412
Bei89	NDENEKS	0.107716
Bei89	NNRGEEL	0.126618
Bei89	KDRNKKS	-0.957688
Bei89	NDKNEEL	0.344269
Bei89	KDRSKEL	-0.664275
[truncated: 3,185 more rows]
