# Supplementary material for: Antigenic evolution of human influenza H3N2 neuraminidase is constrained by charge balancing
Source: eLife journal article supplement (doi:10.7554/elife.72516), 2021-12-08
Supplement: supp [file elife-72516-supp-v1.zip › elife_poa_e72516_Figure_5_figure_supplement_3.pdf]

Frequency change

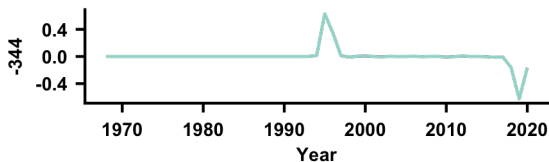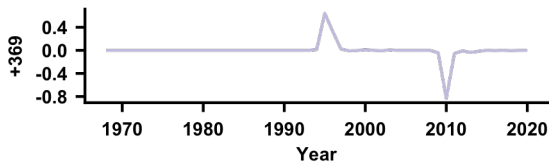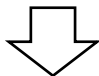

| -344  | +369  | Peak distance<br>(year) | Frequency change |
|-------|-------|-------------------------|------------------|
| Peak1 | Peak1 | 0                       | ++               |
| Peak1 | Peak2 | 15                      | +-               |
| Peak2 | Peak1 | 24                      | -+               |
| Peak2 | Peak2 | 9                       | --               |

Filter: peak distance  $\leq 5$

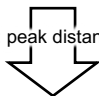

$$E(-344, +369) = \sum_k^N C e^{-d_k} = e^{-0} = 1$$
