# Supplementary material for: Antigenic evolution of human influenza H3N2 neuraminidase is constrained by charge balancing
Source: eLife journal article supplement (doi:10.7554/elife.72516), 2021-12-08
Supplement: supp [file elife-72516-supp-v1.zip › elife_poa_e72516_Figure_5_source_data_2.csv]

	Charge state i	Charge state j	Coevol_S
1	+328	+368	-0.123757591346964
2	+328	-329	-0.0183156388887342
3	+328	-368	0.123757591346964
4	+328	n329	0.0183156388887342
5	+344	+369	-1
6	+344	-369	1
7	-329	+368	0.135335283236613
8	-329	-368	-0.135335283236613
9	-344	+369	1
10	-344	-369	-1
11	n328	+368	0.123757591346964
12	n328	-329	0.0183156388887342
13	n328	-368	-0.123757591346964
14	n328	n329	-0.0183156388887342
15	n329	+368	-0.135335283236613
16	n329	-368	0.135335283236613
