# Supplementary material for: Antigenic evolution of human influenza H3N2 neuraminidase is constrained by charge balancing
Source: eLife journal article supplement (doi:10.7554/elife.72516), 2021-12-08
Supplement: supp [file elife-72516-supp-v1.zip › elife_poa_e72516_Supplementary_file_1.xlsx]

## Sheet: Sheet1
Strain	PCR reaction	Primer name	Molar ratio	Sequence (from 5’ to 3’)
HK68	Mutant library insert	NA_hk68_P1-1F	2	ACGCCGTCTCACCTAGAAASRACGACAGATCTAGCAATAGCAATTGCAGGAATCCTAAT
		NA_hk68_P1-2F	1	ACGCCGTCTCACCTAGAAASAGCGACAGATCTAGCAATAGCAATTGCAGGAATCCTAAT
		NA_hk68_P2-1F	2	GCAATAGCAATTGCAGGAATCCTAATAATGAGARAGGGAATCAAGGAGTGAAAGG
		NA_hk68_P2-2F	1	GCAATAGCAATTGCAGGAATCCTAATAATGAGGAAGGGAATCAAGGAGTGAAAGG
		NA_hk68_P3-1R	2	AGTACGTCTCATAACCTGAGCGTRAMTCCTYGYTGATCGTTCTTCCCATCCACA
		NA_hk68_P3-2R	2	AGTACGTCTCATAACCTGAGCGTRATKTCTYGYTGATCGTTCTTCCCATCCACA
		NA_hk68_P3-3R	1	AGTACGTCTCATAACCTGAGCGTRATKTCTYGCCGATCGTTCTTCCCATCCACA
		NA_hk68_P3-4R	1	AGTACGTCTCATAACCTGAGCGTRAMTCCTYGCCGATCGTTCTTCCCATCCACA
	Mutant library vector	NA_hk68_VF	1	AGCTCGTCTCGGTTATGAAACTTTCAAAGTCATTGGTGG
		NA_hk68_VR	1	CGACCGTCTCCTAGGTGTGTCGCCAACAAGCCCTGAGCA
	Sequencing	HK68_7mutlib_recover-F	1	CACTCTTTCCCTACACGACGCTCTTCCGATCTTGCTCAGGGCTTGTTGGCGACACA
	library preparation	HK68_7mutlib_recover-R	1	GACTGGAGTTCAGACGTGTGCTCTTCCGATCTAATGACTTTGAAAGTTTCATAACC
Bk79	Mutant library insert	NA_bk79_P1-1F	2	ACGCCGTCTCACCCAGAAASRACGACAGATCTAGCAGTAGCTATTGCCGGAATCCTAAC
		NA_bk79_P1-2F	1	ACGCCGTCTCACCCAGAAASAGCGACAGATCTAGCAGTAGCTATTGCCGGAATCCTAAC
		NA_bk79_P2-1F	2	GCAGTAGCTATTGCCGGAATCCTAACAATGAGARAGGGAATCATGGAGTGAAAGG
		NA_bk79_P2-2F	1	GCAGTAGCTATTGCCGGAATCCTAACAATGAGGAAGGGAATCATGGAGTGAAAGG
		NA_bk79_P3-1R	2	AGTACGTCTCATAACCTGATCGTRAMTCCTYGYTGATCGTTCTTCCCATCCACA
		NA_bk79_P3-2R	2	AGTACGTCTCATAACCTGATCGTRATKTCTYGYTGATCGTTCTTCCCATCCACA
		NA_bk79_P3-3R	1	AGTACGTCTCATAACCTGATCGTRATKTCTYGCCGATCGTTCTTCCCATCCACA
		NA_bk79_P3-4R	1	AGTACGTCTCATAACCTGATCGTRAMTCCTYGCCGATCGTTCTTCCCATCCACA
	Mutant library vector	NA_bk79_VF	1	AGCTCGTCTCGGTTATGAAACCTTCAAAGTCATTGGTGG
		NA_bk79_VR	1	CGACCGTCTCCTGGGTGTGTCGCCAACAAGCCCTGAGCA
	Sequencing	Bk79_7mutlib_recover-F	1	CACTCTTTCCCTACACGACGCTCTTCCGATCTTGCTCAGGGCTTGTTGGAGACACA
	library preparation	Bk79_7mutlib_recover-R	1	GACTGGAGTTCAGACGTGTGCTCTTCCGATCTAATGACTTTGAAGGTTTCATAACC
Bei89	Mutant library insert	NA_bei89_P1-1F	2	ACGCCGTCTCACCCAGAAASRACGACAGCTCCAGCAGTAGCTATTGCCGGAATCCTAAC
		NA_bei89_P1-2F	1	ACGCCGTCTCACCCAGAAASAGCGACAGCTCCAGCAGTAGCTATTGCCGGAATCCTAAC
		NA_bei89_P2-1F	2	GCAGTAGCTATTGCCGGAATCCTAACAATGAGARAGGGAGTCATGGAGTGAAAGG
		NA_bei89_P2-2F	1	GCAGTAGCTATTGCCGGAATCCTAACAATGAGGAAGGGAGTCATGGAGTGAAAGG
		NA_bei89_P3-1R	2	AGTACGTCTCATAACCTGAGCGTRAMTCCTYGYTGATCGTTCTTCCCATCCACA
		NA_bei89_P3-2R	2	AGTACGTCTCATAACCTGAGCGTRATKTCTYGYTGATCGTTCTTCCCATCCACA
		NA_bei89_P3-3R	1	AGTACGTCTCATAACCTGAGCGTRATKTCTYGCCGATCGTTCTTCCCATCCACA
		NA_bei89_P3-4R	1	AGTACGTCTCATAACCTGAGCGTRAMTCCTYGCCGATCGTTCTTCCCATCCACA
	Mutant library vector	NA_bei89_VF	1	AGCTCGTCTCGGTTATGAAACCTTCAAAGTCATTGGAGG
		NA_bei89_VR	1	CGACCGTCTCCTGGGTGTGTCTCCAACAAGCCCTGAGCA
	Sequencing	Bei89_7mutlib_recover-F	1	CACTCTTTCCCTACACGACGCTCTTCCGATCTTGCTCAGGGCTTGTTGGAGACACA
	library preparation	Bei89_7mutlib_recover-R	1	GACTGGAGTTCAGACGTGTGCTCTTCCGATCTAATGACTTTGAAGGTTTCATAACC
Mos99	Mutant library insert	NA_mos99_P1-1F	2	ACGCCGTCTCACCCAGAAASRACGACAGCTCCAGCAGTAGCCATTGCTTGGATCCTAAC
		NA_mos99_P1-2F	1	ACGCCGTCTCACCCAGAAASAGCGACAGCTCCAGCAGTAGCCATTGCTTGGATCCTAAC
		NA_mos99_P2-1F	2	GCAGTAGCCATTGCTTGGATCCTAACAATGAGARAGGTGGTCATGGAGTGAAAGG
		NA_mos99_P2-2F	1	GCAGTAGCCATTGCTTGGATCCTAACAATGAGGAAGGTGGTCATGGAGTGAAAGG
		NA_mos99_P3-1R	2	AGTACGTCTCATATCCTGAGCGTRAMTCCTYGYTGATCGTTCTTCCCATCCACA
		NA_mos99_P3-2R	2	AGTACGTCTCATATCCTGAGCGTRATKTCTYGYTGATCGTTCTTCCCATCCACA
		NA_mos99_P3-3R	1	AGTACGTCTCATATCCTGAGCGTRATKTCTYGCCGATCGTTCTTCCCATCCACA
		NA_mos99_P3-4R	1	AGTACGTCTCATATCCTGAGCGTRAMTCCTYGCCGATCGTTCTTCCCATCCACA
	Mutant library vector	NA_mos99_VF	1	AGCTCGTCTCGGATATGAAACCTTCAAAGTCATTGAAGG
		NA_mos99_VR	1	CGACCGTCTCCTGGGTGTGTCTCCAACAAGTCCTGAGCA
	Sequencing	Mos99_7mutlib_recover-F	1	CACTCTTTCCCTACACGACGCTCTTCCGATCTTGCTCAGGACTTGTTGGAGACACA
	library preparation	Mos99_7mutlib_recover-R	1	GACTGGAGTTCAGACGTGTGCTCTTCCGATCTAATGACTTTGAAGGTTTCATATCC
Vic11	Mutant library insert	NA_vic11_P1-1F	2	ACGCCGTCTCACCCAGAAASRACGACAGCTCCAGCAGTAGCCATTGTTTGGATCCTAAC
		NA_vic11_P1-2F	1	ACGCCGTCTCACCCAGAAASAGCGACAGCTCCAGCAGTAGCCATTGTTTGGATCCTAAC
		NA_vic11_P2-1F	2	GCAGTAGCCATTGTTTGGATCCTAACAATGAAARAGGTGGTCATGGAGTGAAAGG
		NA_vic11_P2-2F	1	GCAGTAGCCATTGTTTGGATCCTAACAATGAAGAAGGTGGTCATGGAGTGAAAGG
		NA_vic11_P3-1R	2	AGTACGTCTCATACCCTAAGCGTRAMTCCTYGYTGATTGTTCTTCCCATCCACA
		NA_vic11_P3-2R	2	AGTACGTCTCATACCCTAAGCGTRATKTCTYGYTGATTGTTCTTCCCATCCACA
		NA_vic11_P3-3R	1	AGTACGTCTCATACCCTAAGCGTRATKTCTYGCCGATTGTTCTTCCCATCCACA
		NA_vic11_P3-4R	1	AGTACGTCTCATACCCTAAGCGTRAMTCCTYGCCGATTGTTCTTCCCATCCACA
	Mutant library vector	NA_vic11_VF	1	AGCTCGTCTCGGGTATGAAACCTTCAAAGTCATTGAAGG
		NA_vic11_VR	1	CGACCGTCTCCTGGGTGTGTCTCCAACAAGTCCTGAACA
	Sequencing	Vic11_7mutlib_recover-F	1	CACTCTTTCCCTACACGACGCTCTTCCGATCTTGTTCAGGACTTGTTGGAGACACA
	library preparation	Vic11_7mutlib_recover-R	1	GACTGGAGTTCAGACGTGTGCTCTTCCGATCTAATGACTTTGAAGGTTTCATACCC
HK19	Mutant library insert	NA_hk19_P1-1F	2	ACGCCGTCTCACCCAGAAASRACGACAGCTCCAGCAGTAGCCATTGTTTGAATCCTAAC
		NA_hk19_P1-2F	1	ACGCCGTCTCACCCAGAAASAGCGACAGCTCCAGCAGTAGCCATTGTTTGAATCCTAAC
		NA_hk19_P2-1F	2	GCAGTAGCCATTGTTTGAATCCTAACAATGAAARAGGTGGTCATGGAGTGAAAGG
		NA_hk19_P2-2F	1	GCAGTAGCCATTGTTTGAATCCTAACAATGAAGAAGGTGGTCATGGAGTGAAAGG
		NA_hk19_P3-1R	2	AGTACGTCTCATACCCTAAGCGTRAMTCCTYGYTGATTGTTCTCCCCATCCACA
		NA_hk19_P3-2R	2	AGTACGTCTCATACCCTAAGCGTRATKTCTYGYTGATTGTTCTCCCCATCCACA
		NA_hk19_P3-3R	1	AGTACGTCTCATACCCTAAGCGTRATKTCTYGCCGATTGTTCTCCCCATCCACA
		NA_hk19_P3-4R	1	AGTACGTCTCATACCCTAAGCGTRAMTCCTYGCCGATTGTTCTCCCCATCCACA
	Mutant library vector	NA_hk19_VF	1	AGCTCGTCTCGGGTATGAAACCTTCAAAGTCGTTGAAGG
		NA_hk19_VR	1	CGACCGTCTCCTGGGTGTGTCTCCAACAAGCCCTGAACA
	Sequencing	HK19_7mutlib_recover-F	1	CACTCTTTCCCTACACGACGCTCTTCCGATCTTGTTCAGGGCTTGTTGGAGACACA
	library preparation	HK19_7mutlib_recover-R	1	GACTGGAGTTCAGACGTGTGCTCTTCCGATCTAACGACTTTGAAGGTTTCATACCC
