# Supplementary material for: Antigenic evolution of human influenza H3N2 neuraminidase is constrained by charge balancing
Source: eLife journal article supplement (doi:10.7554/elife.72516), 2021-12-08
Supplement: supp [file elife-72516-supp-v1.zip › elife_poa_e72516_Supplementary_file_2.tsv]

Year	Number of sequences
1968	99
1969	12
1970	10
1971	16
1972	25
1973	10
1974	12
1975	10
1976	17
1977	14
1978	6
1979	4
1980	9
1981	3
1982	12
1983	6
1984	4
1985	12
1986	10
1987	6
1988	14
1989	22
1990	11
1991	40
1992	34
1993	105
1994	75
1995	78
1996	89
1997	97
1998	120
1999	176
2000	222
2001	89
2002	260
2003	486
2004	398
2005	432
2006	344
2007	612
2008	827
2009	1272
2010	1298
2011	1915
2012	2794
2013	2195
2014	4054
2015	5280
2016	6491
2017	11886
2018	8399
2019	13754
2020	2396
