# Supplementary figures and images for: Antigenic evolution of human influenza H3N2 neuraminidase is constrained by charge balancing
Source: eLife journal article supplement (doi:10.7554/elife.72516), 2021-12-08

HK68

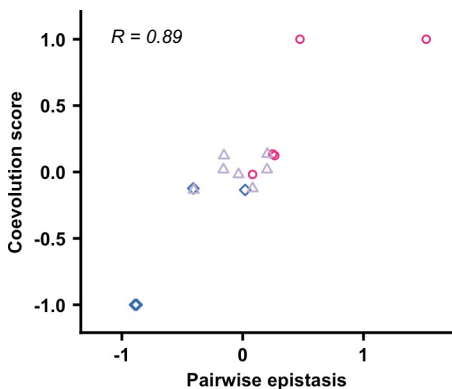

Bk79

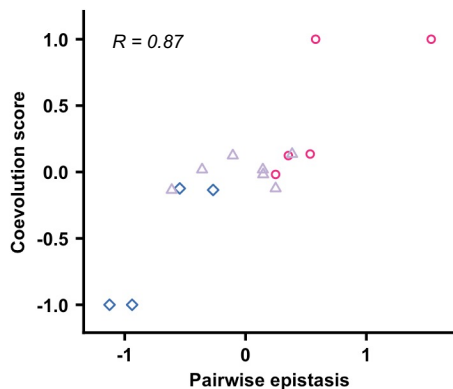

Bei89

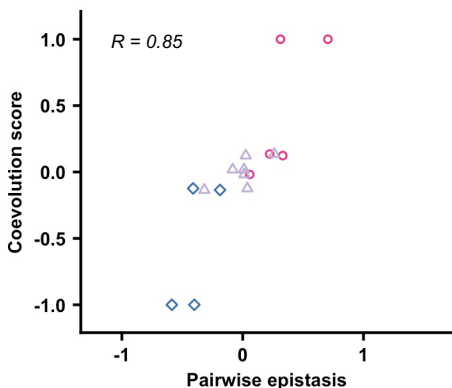

Mos99

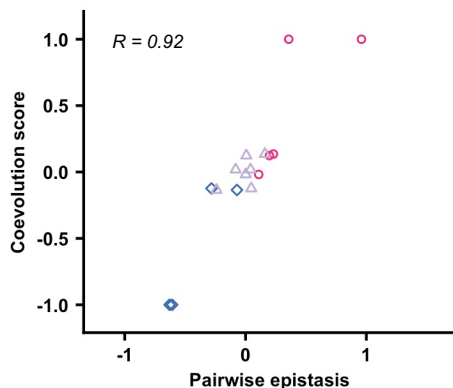

△ Neutral  
○ Opposite charge  
◇ Same charge

Vic11

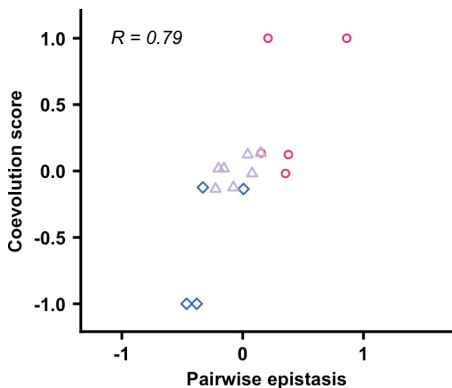

HK19

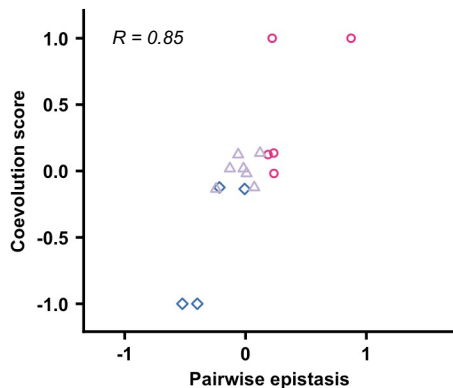

Supplement: supp [file elife-72516-supp-v1.zip]

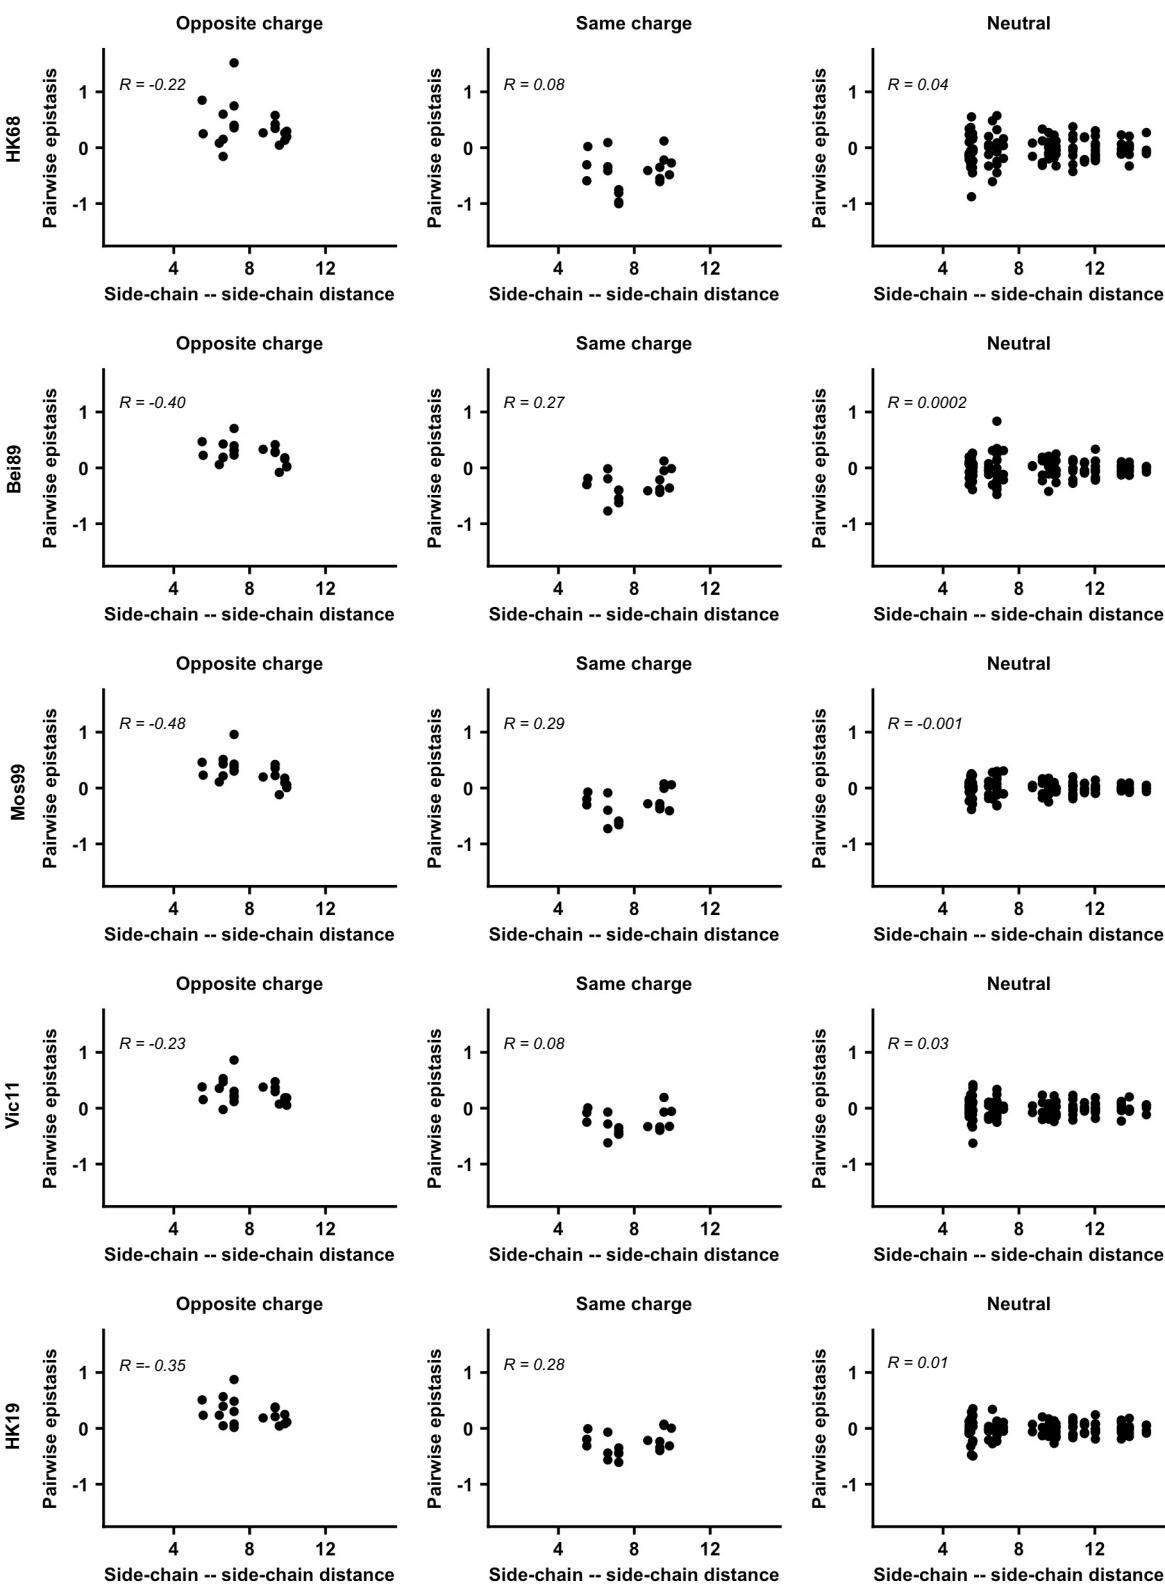

Supplement: supp [file elife-72516-supp-v1.zip]

HK68

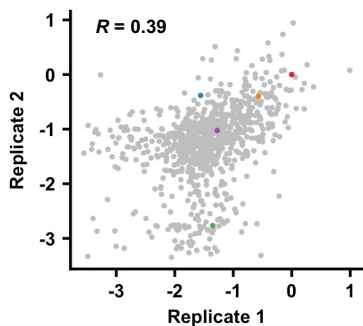

Bk79

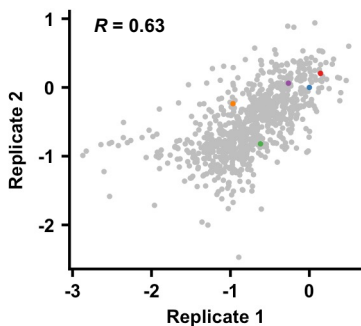

Bei89

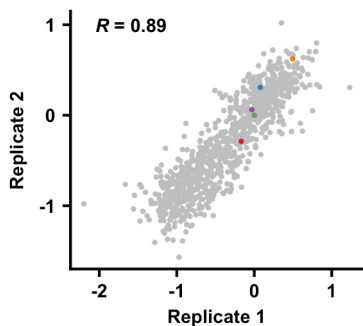

Mos99

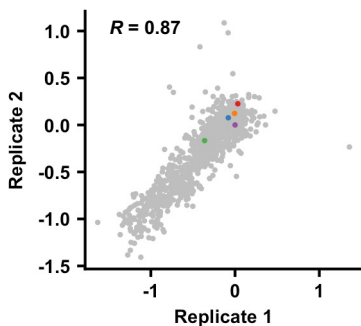

Vic11

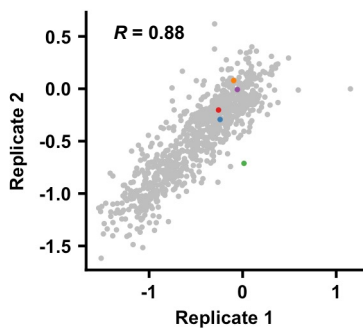

HK19

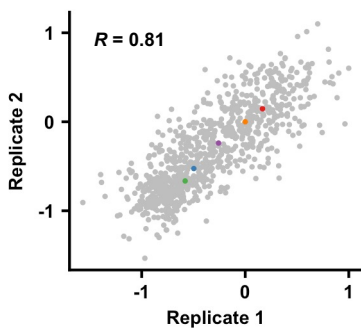

● mutant  
● HK68  
● Bk79  
● Bei89  
● Mos99  
● HK19

Supplement: supp [file elife-72516-supp-v1.zip]

HK68

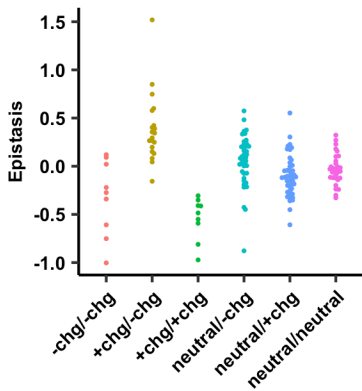

Bk79

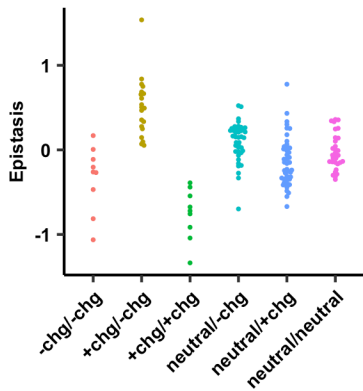

Bei89

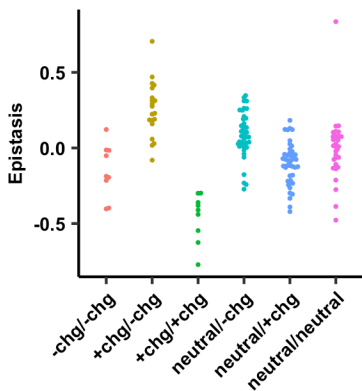

Mos99

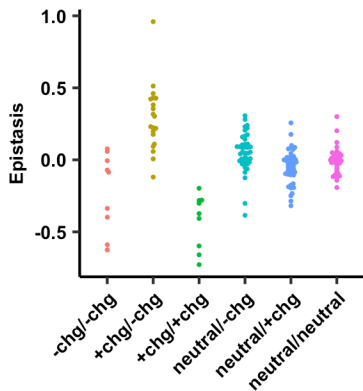

Vic11

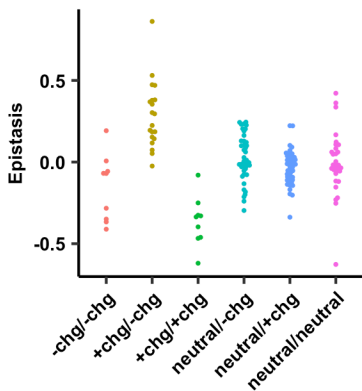

HK19

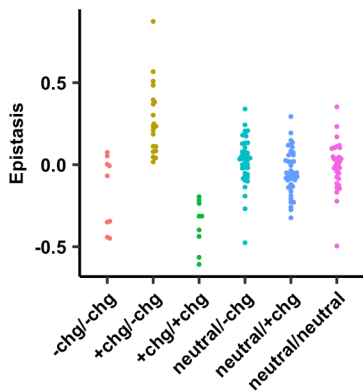

Supplement: supp [file elife-72516-supp-v1.zip]

HK68

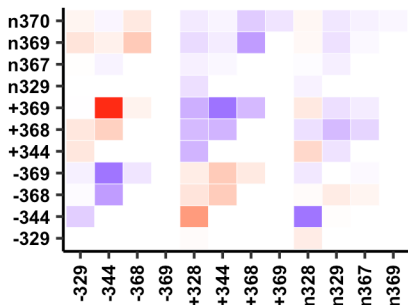

Bk79

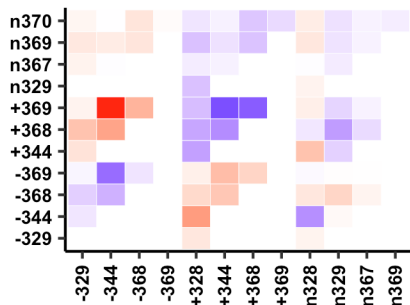

Bei89

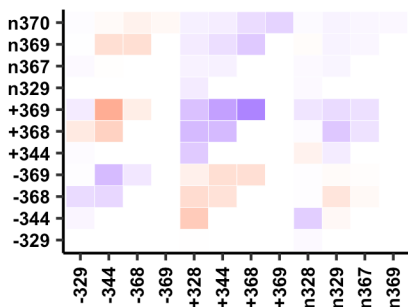

Mos99

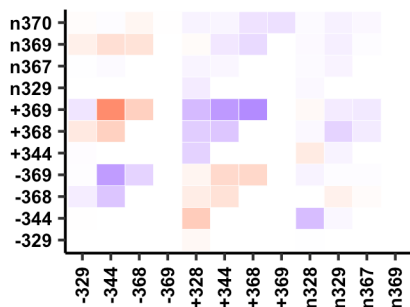

Vic11

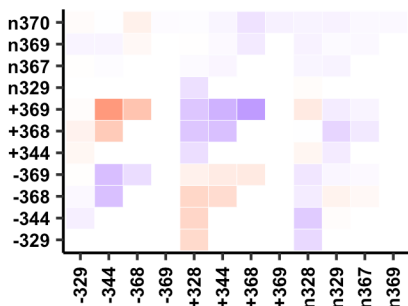

HK19

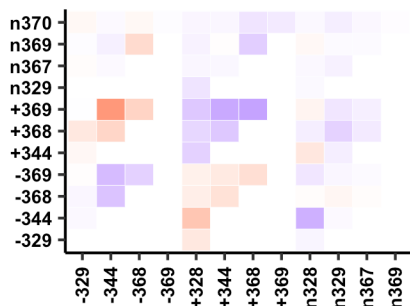

Pairwise epistasis

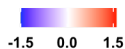

Supplement: supp [file elife-72516-supp-v1.zip]

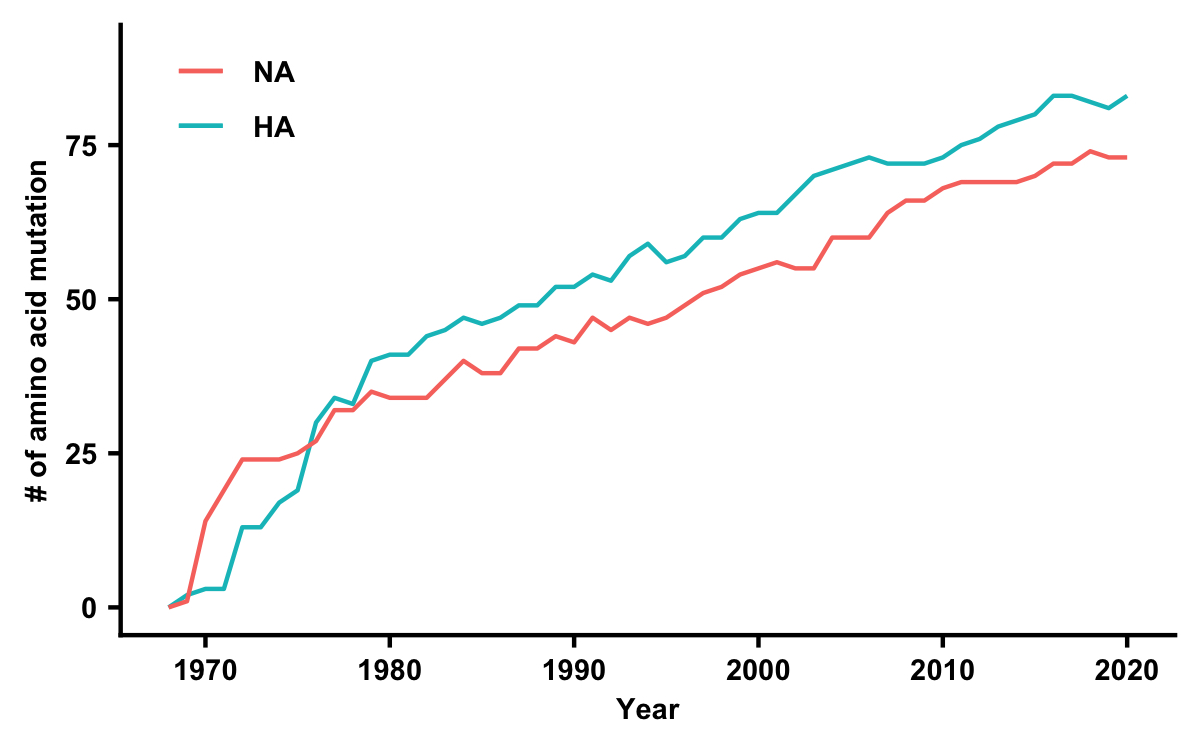

Supplement: supp [file elife-72516-supp-v1.zip › elife_poa_e72516_Figure_1_figure_supplement_1.jpg]

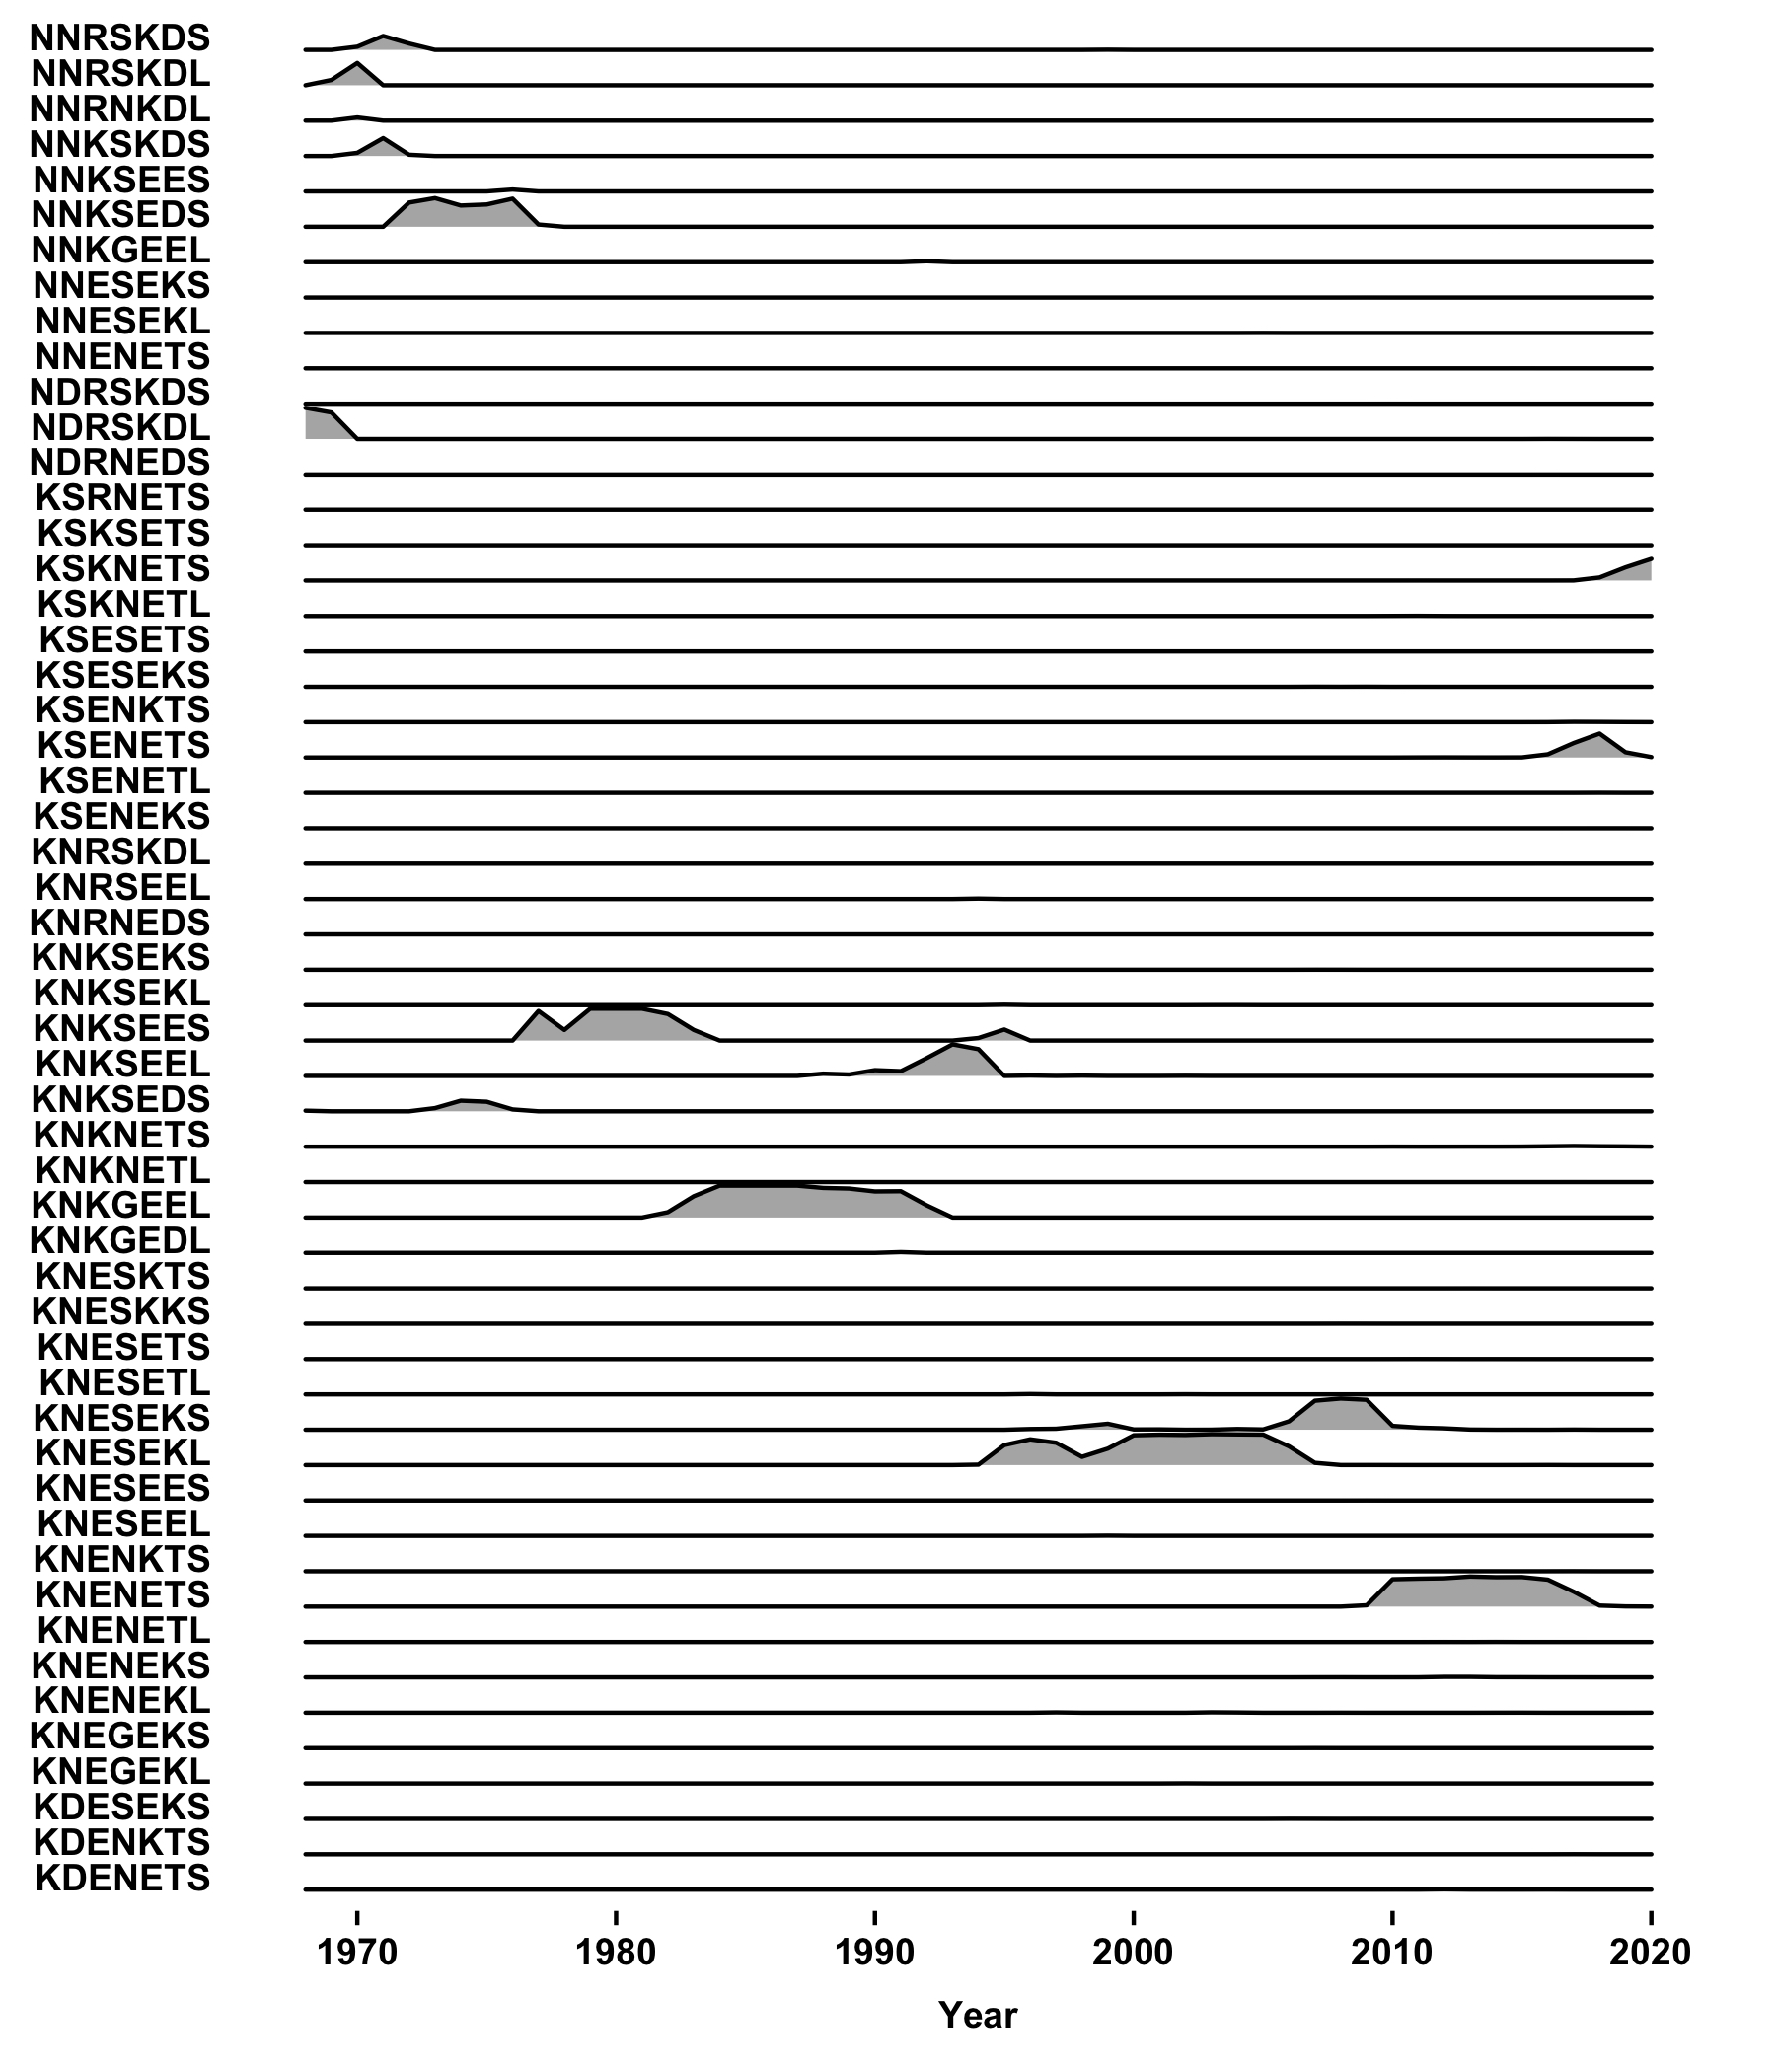

Supplement: supp [file elife-72516-supp-v1.zip › elife_poa_e72516_Figure_1_figure_supplement_2.jpg]

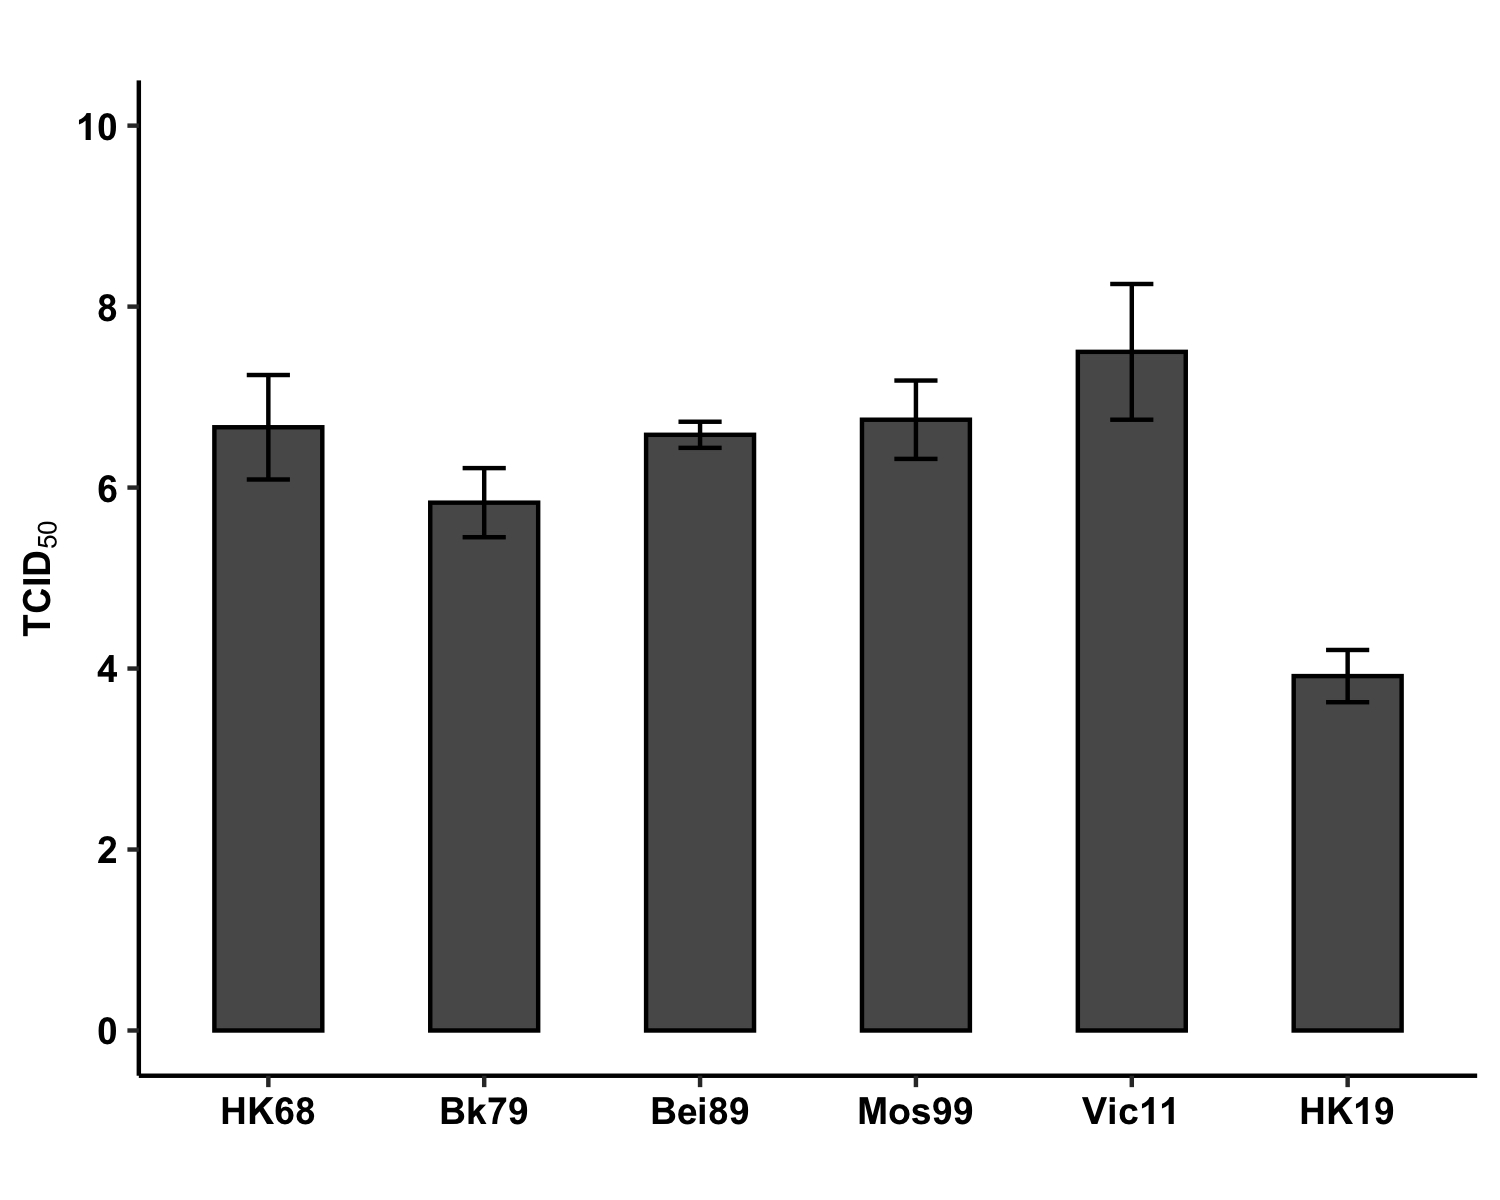

Supplement: supp [file elife-72516-supp-v1.zip › elife_poa_e72516_Figure_2_figure_supplement_1.jpg]

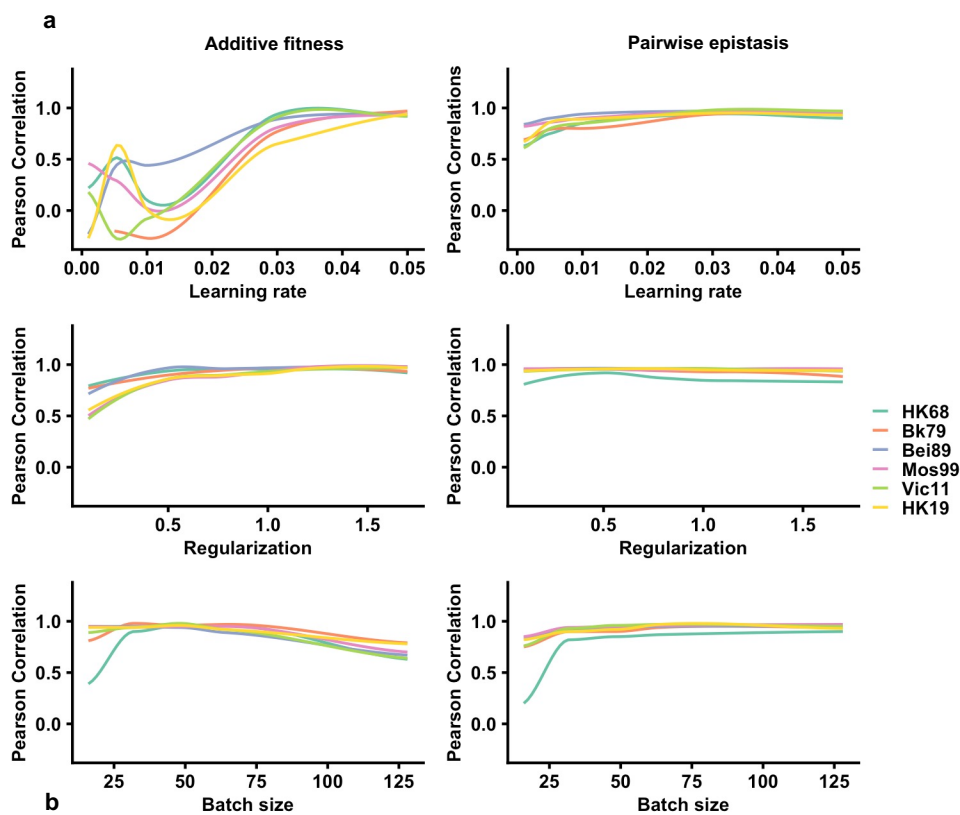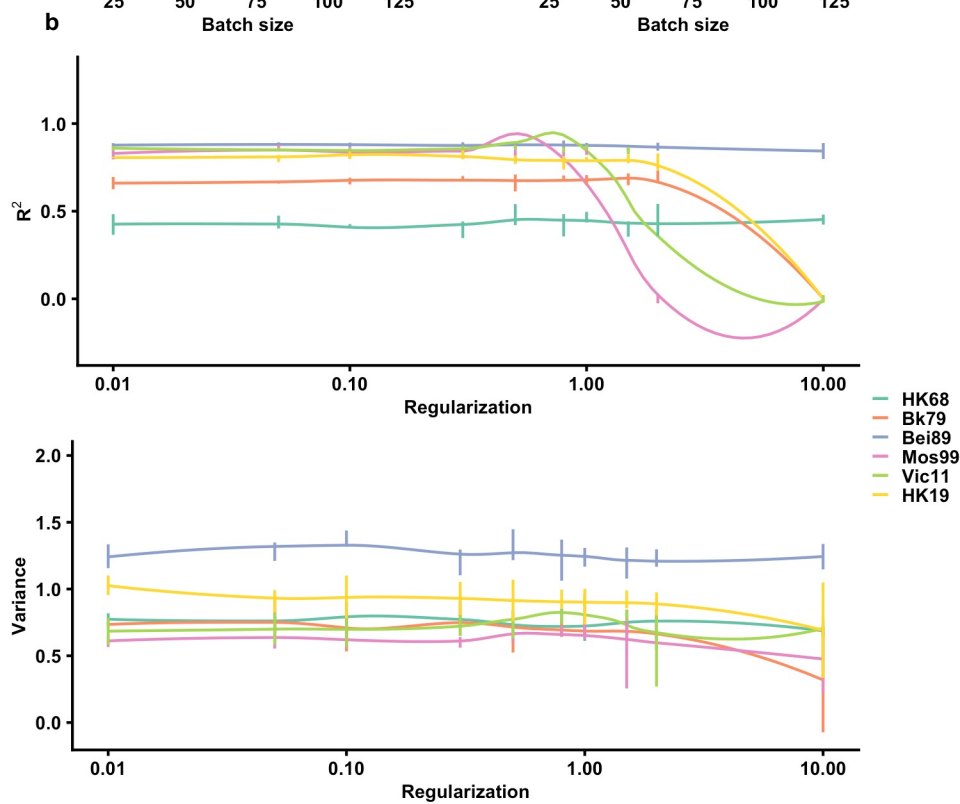

Supplement: supp [file elife-72516-supp-v1.zip › elife_poa_e72516_Figure_3_figure_supplement_1.pdf]

HK68

Bk79

Bei89

Mos99

Vic11

HK19

HK68

Bk79

Bei89

Mos99

Vic11

HK19

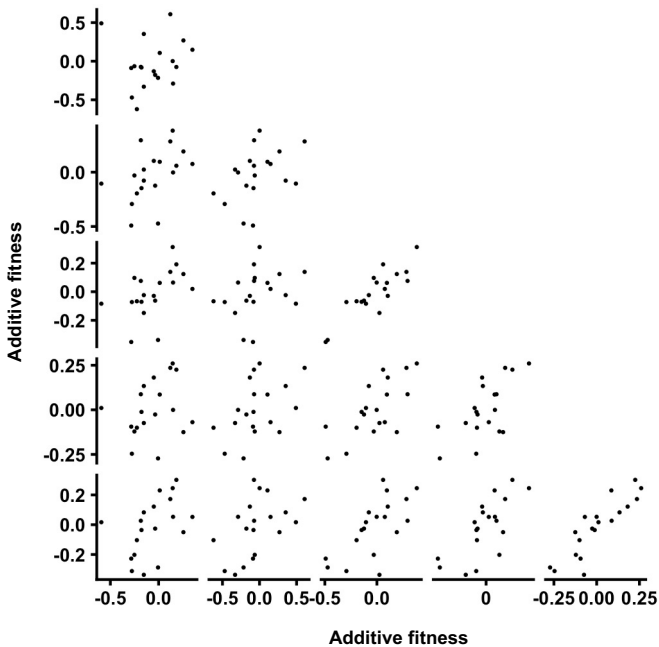

Supplement: supp [file elife-72516-supp-v1.zip › elife_poa_e72516_Figure_3_figure_supplement_2.pdf]

HK68

Bk79

Bei89

Mos99

Vic11

HK19

HK68

Bk79

Beis89

Mos99

Vic11

HK19

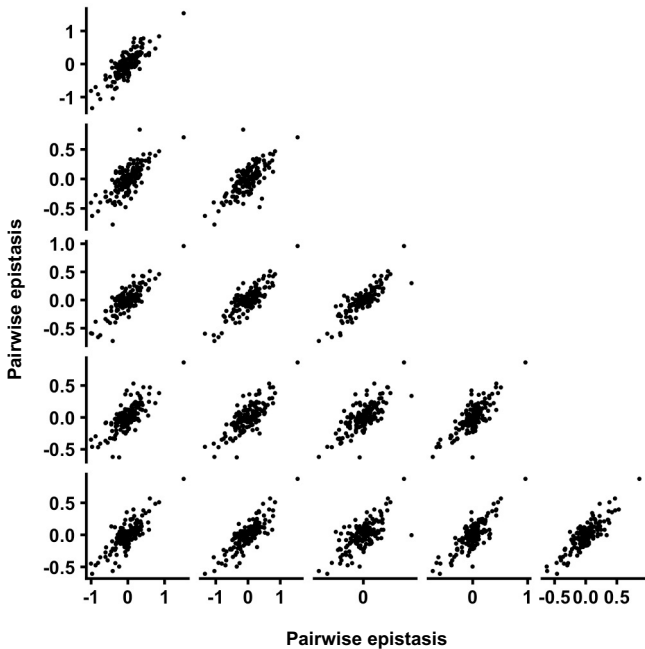

Supplement: supp [file elife-72516-supp-v1.zip › elife_poa_e72516_Figure_3_figure_supplement_3.pdf]

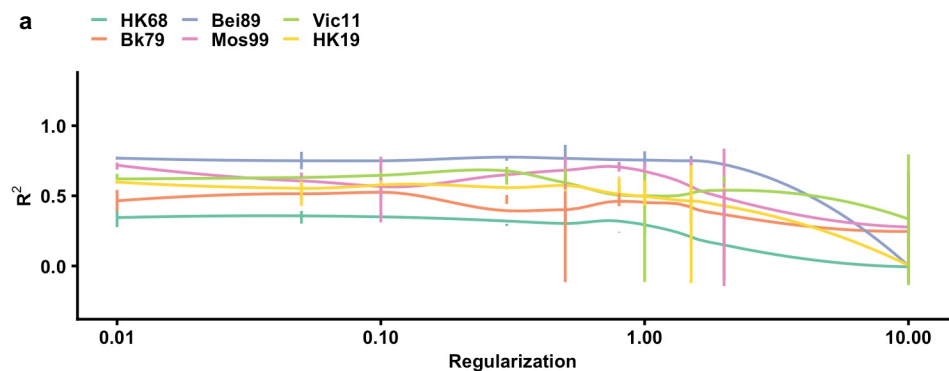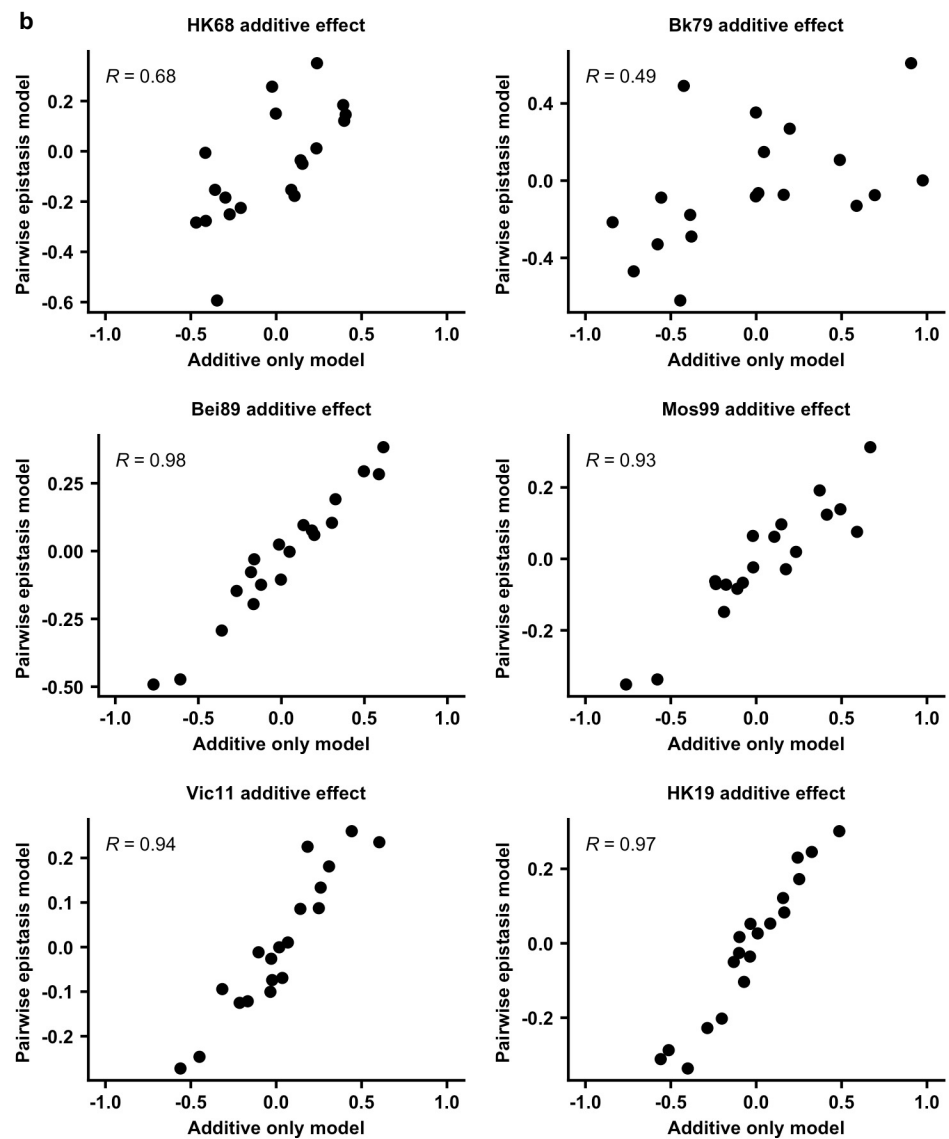

Supplement: supp [file elife-72516-supp-v1.zip › elife_poa_e72516_Figure_3_figure_supplement_4.pdf]

HK68

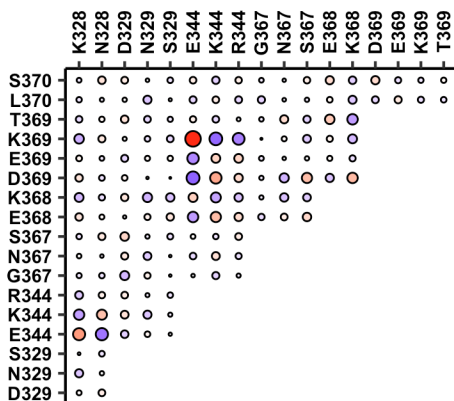

Bk79

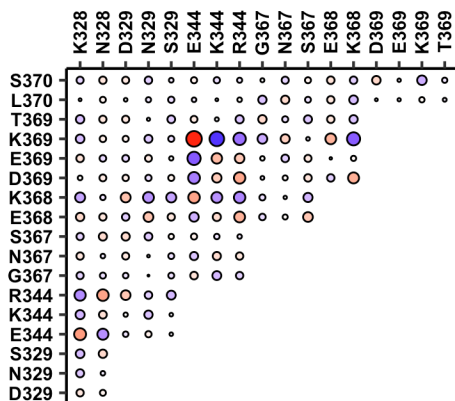

Bei89

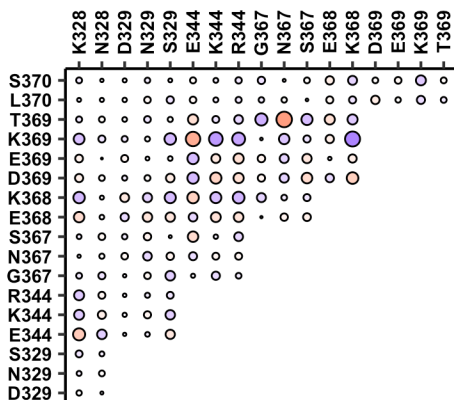

Mos99

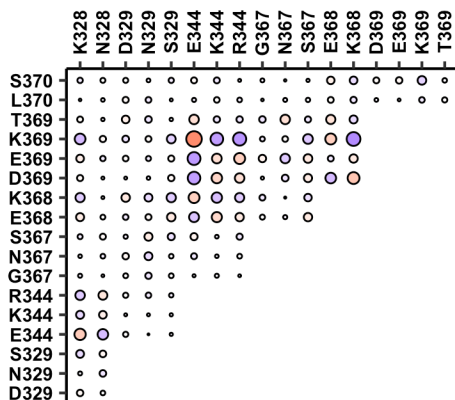

Vic11

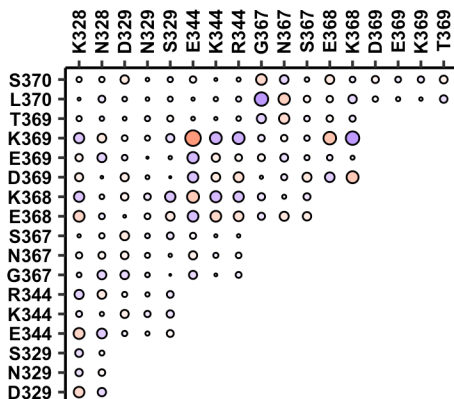

HK19

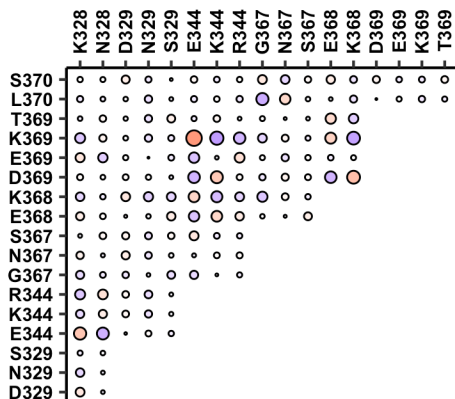

Pairwise epistasis

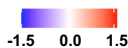

Supplement: supp [file elife-72516-supp-v1.zip › elife_poa_e72516_Figure_3_figure_supplement_5.pdf]

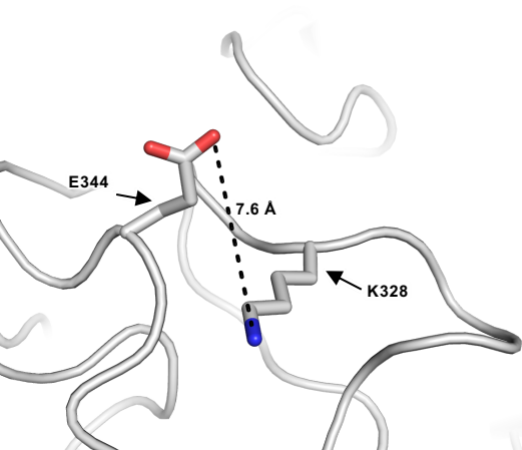

Supplement: supp [file elife-72516-supp-v1.zip › elife_poa_e72516_Figure_4_figure_supplement_2.pdf]

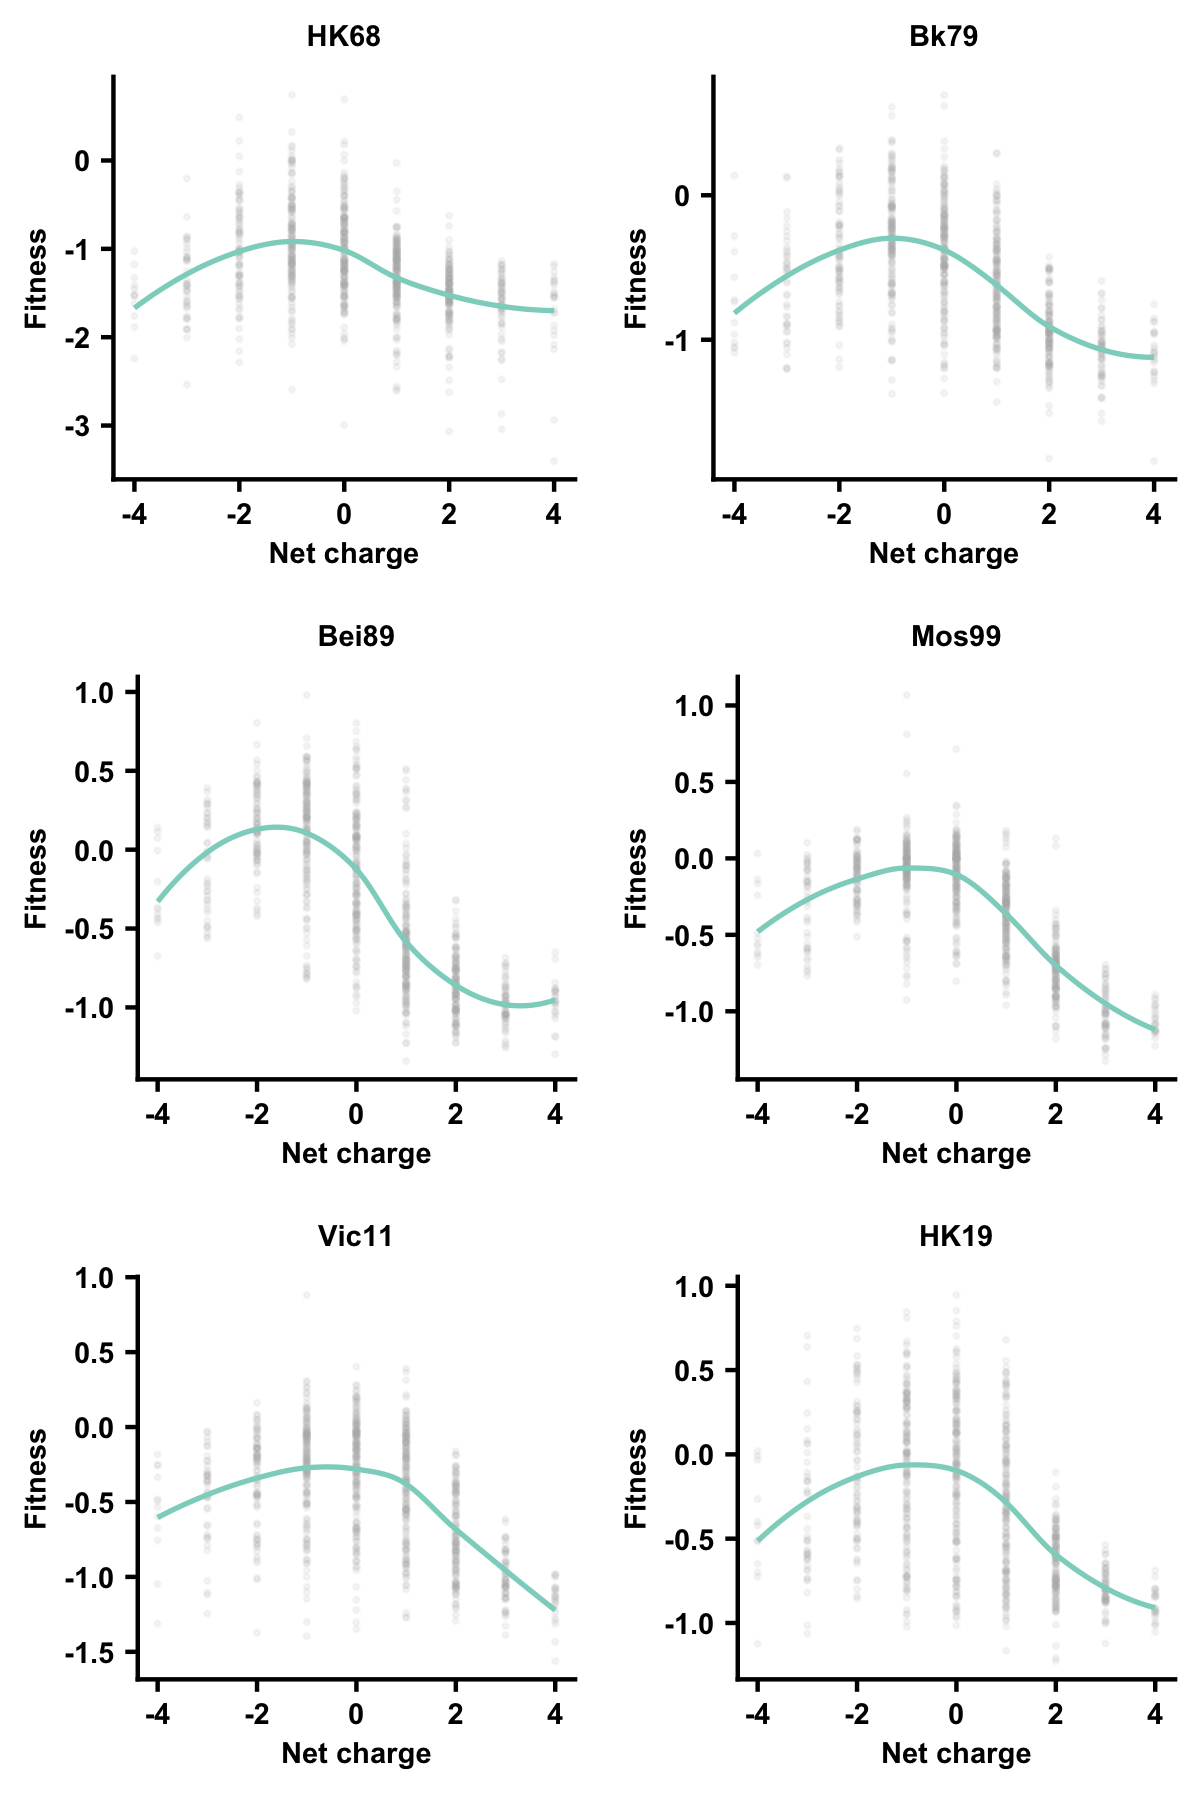

Supplement: supp [file elife-72516-supp-v1.zip › elife_poa_e72516_Figure_4_figure_supplement_4.jpg]

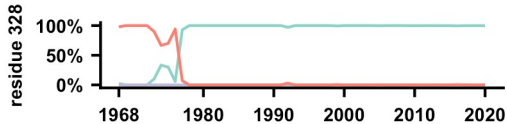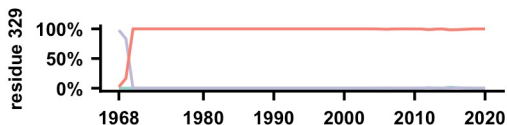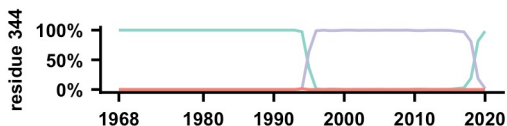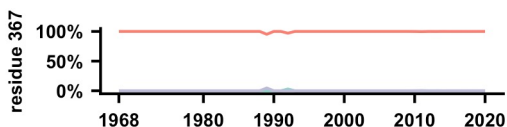

— +  
— -  
— neutral

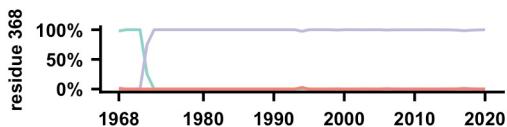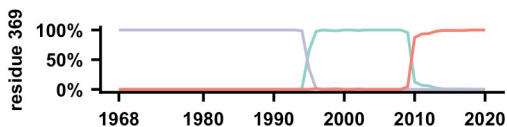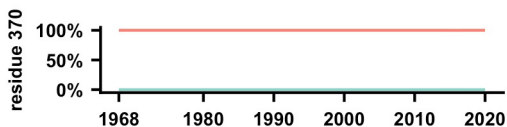

Year

Supplement: supp [file elife-72516-supp-v1.zip › elife_poa_e72516_Figure_5_figure_supplement_1.pdf]

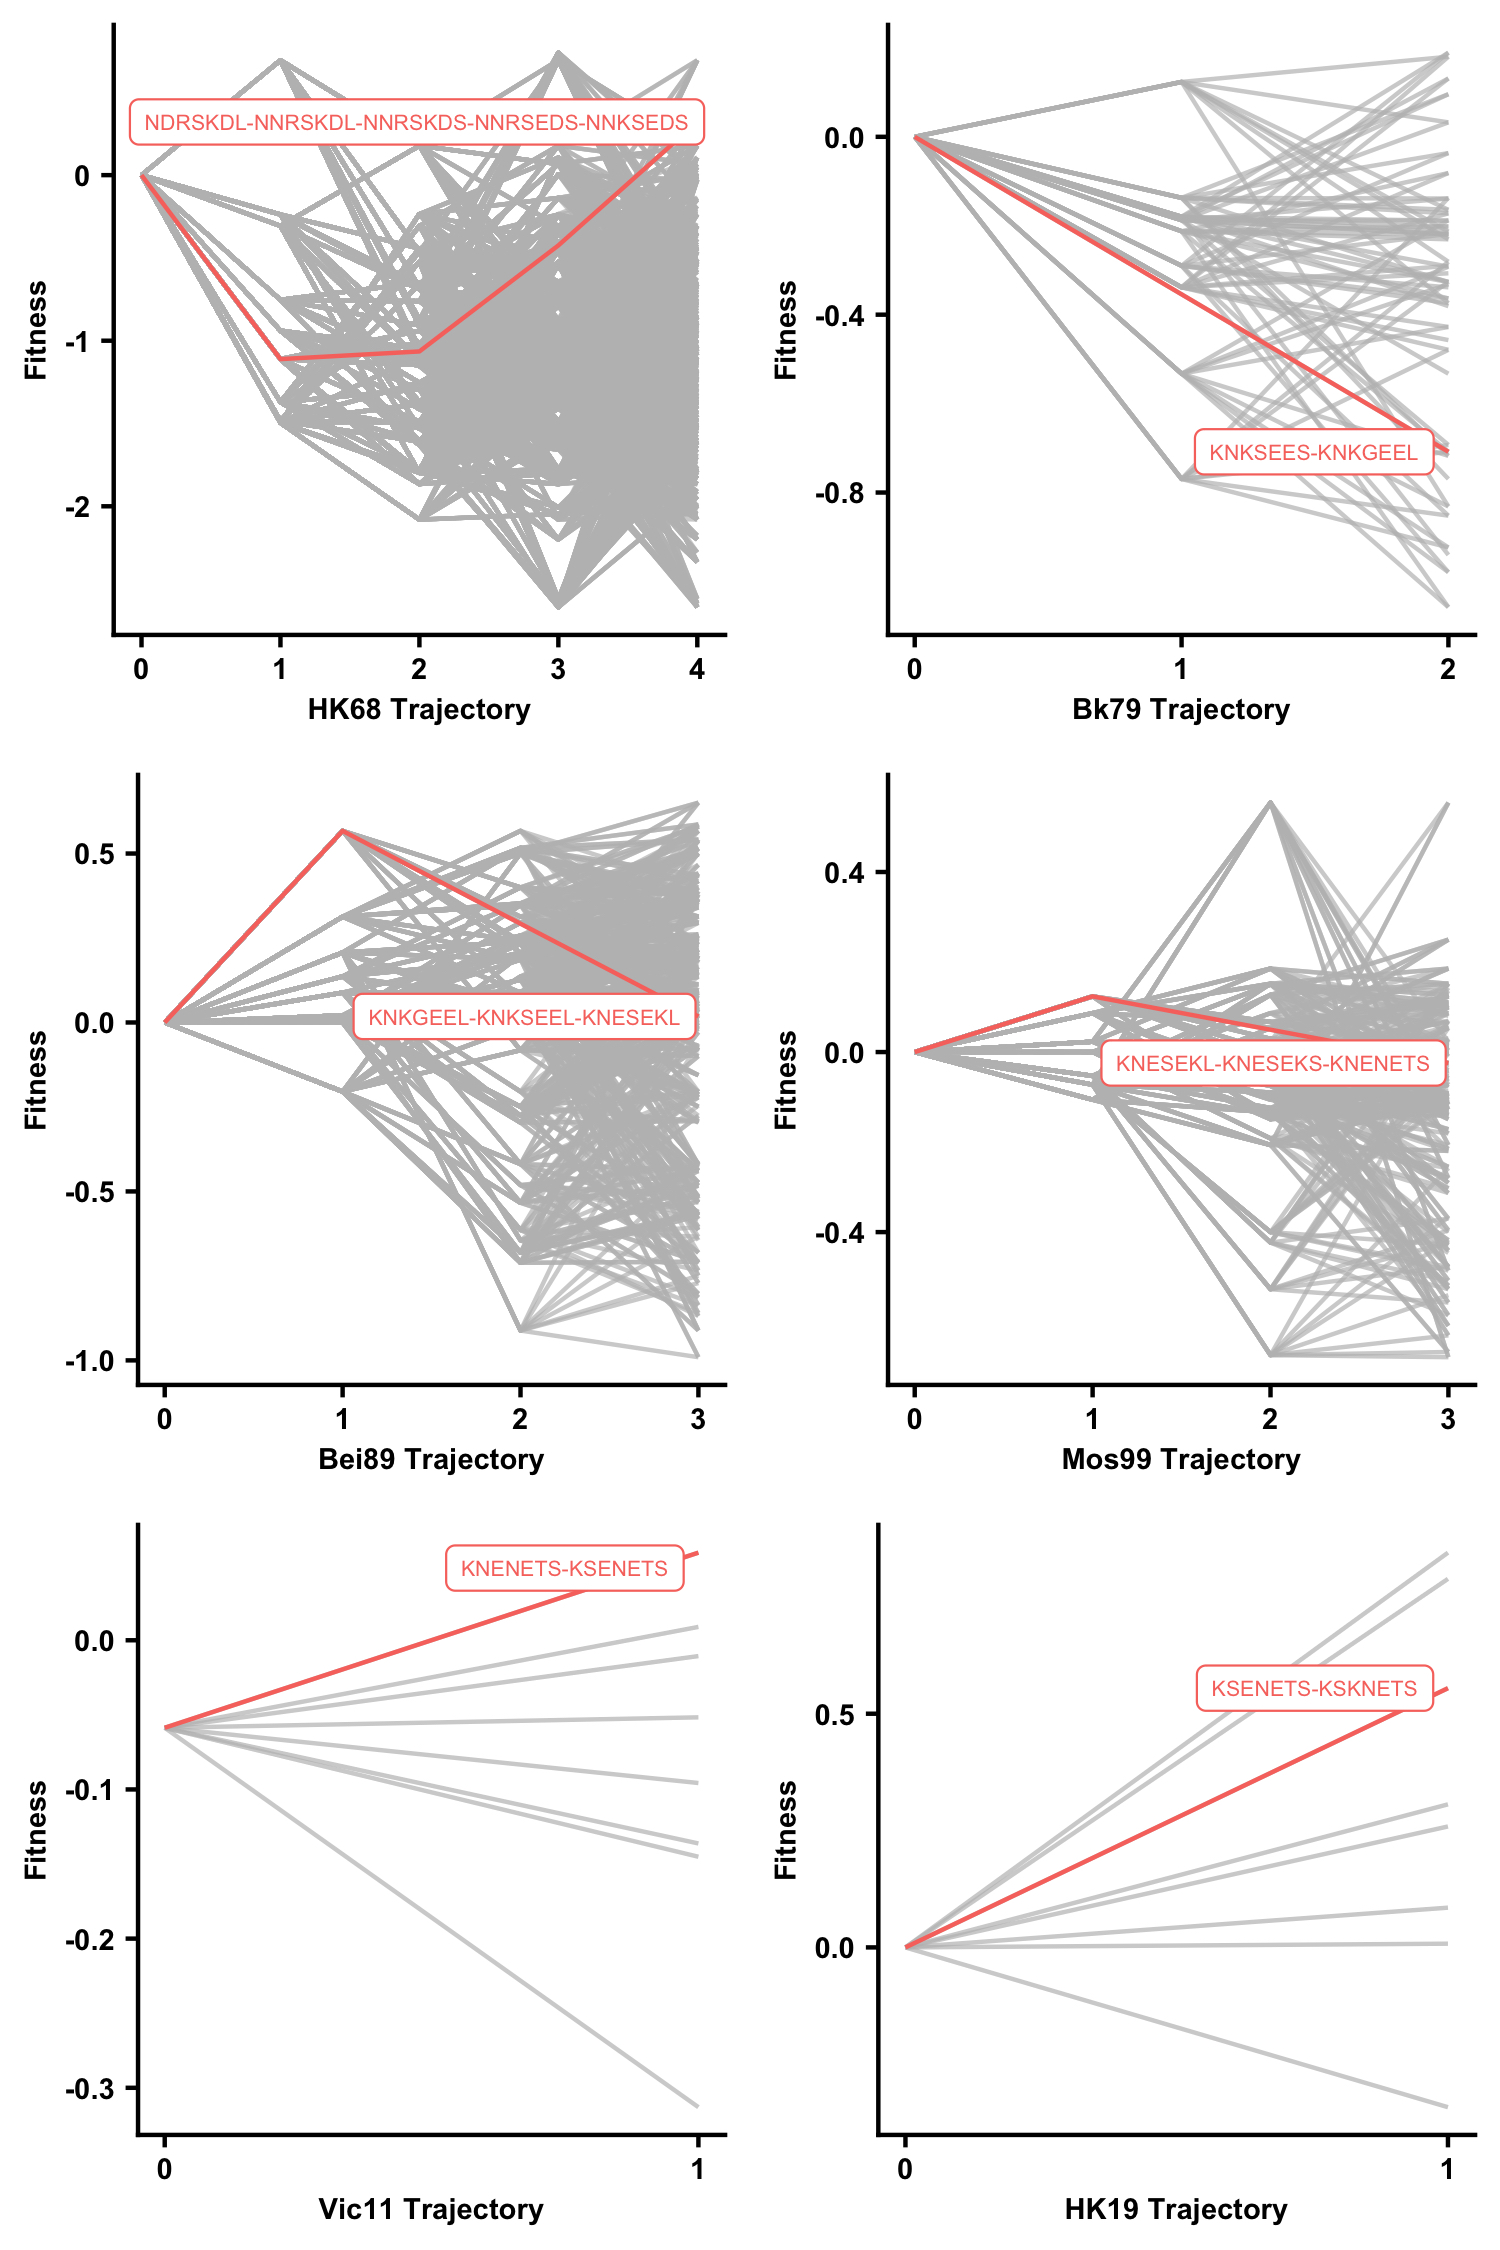

Supplement: supp [file elife-72516-supp-v1.zip › elife_poa_e72516_Figure_5_figure_supplement_5.jpg]

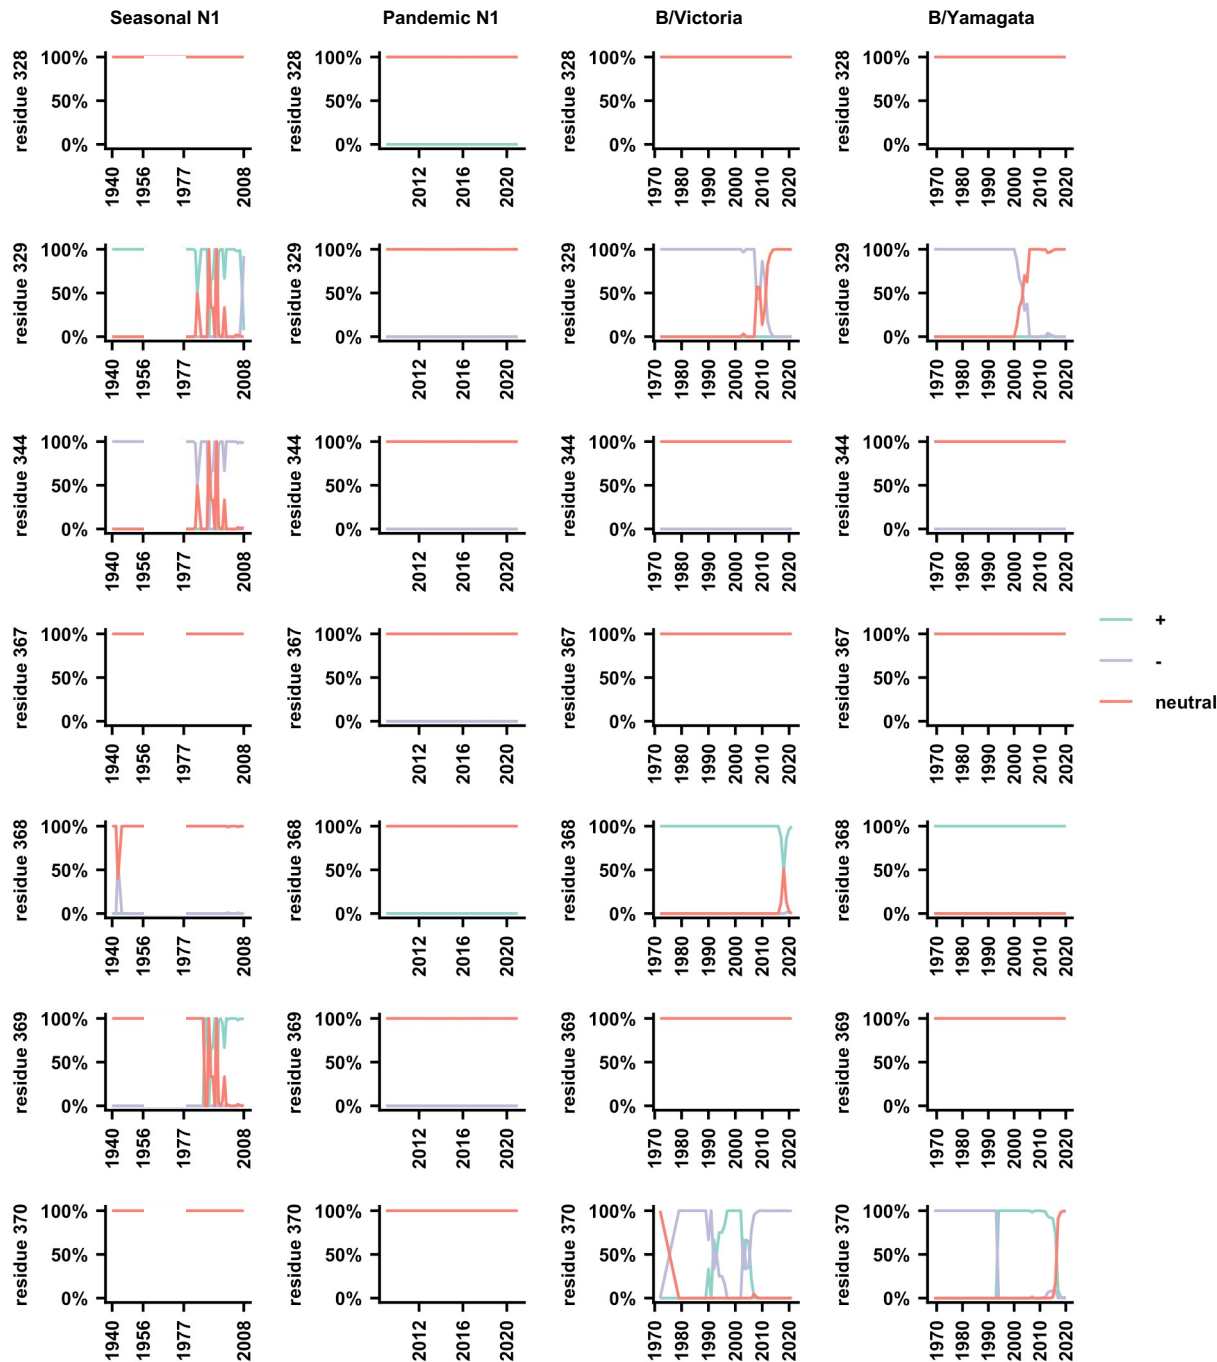

Supplement: supp [file elife-72516-supp-v1.zip › elife_poa_e72516_Figure_5_figure_supplement_6.pdf]
